# Supplementary material for: Transcriptome analysis of the compatible interaction of tomato with Verticillium dahliae using RNA-sequencing
Source: Front Plant Sci. 2015 Jun 8;6:428. doi: 10.3389/fpls.2015.00428 (PMC4458571; doi:10.3389/fpls.2015.00428)
Supplement: Supplementary file 1 [file Table_1.XLS]

## Sheet: Mock vs Treat
Table S1. Differentially expressed genes between two tomato samples
Gene ID #	FDR	log2FC	regulated
Solyc00g174330.2	0	2.3471	up
Solyc00g282510.1	0	3.58393	up
Solyc01g005470.2	0	3.72102	up
Solyc01g005500.2	0	3.95448	up
Solyc01g006050.2	0	3.4803	up
Solyc01g006950.2	0	3.08244	up
Solyc01g008620.2	0	2.65374	up
Solyc01g009870.2	0	3.62947	up
Solyc01g058720.2	0	2.57198	up
Solyc01g067020.2	0	4.10039	up
Solyc01g086680.2	0	3.214	up
Solyc01g087280.1	0	5.96329	up
Solyc01g095080.2	0	4.13313	up
Solyc01g096720.2	0	3.57129	up
Solyc01g097240.2	0	3.47029	up
Solyc01g097380.1	0	3.89576	up
Solyc01g097390.2	0	3.57904	up
Solyc01g101050.2	0	2.74404	up
Solyc01g101170.2	0	7.16579	up
Solyc01g101180.2	0	7.98019	up
Solyc01g101190.2	0	7.55374	up
Solyc01g102890.2	0	5.04351	up
Solyc01g102910.2	0	5.75267	up
Solyc01g103650.2	0	2.95625	up
Solyc01g104740.2	0	3.75562	up
Solyc01g105070.2	0	3.22572	up
Solyc01g108350.2	0	6.30815	up
Solyc01g108360.2	0	5.95043	up
Solyc01g109140.2	0	4.77505	up
Solyc01g109380.2	0	6.70017	up
Solyc01g109710.2	0	2.46435	up
Solyc02g036480.1	0	3.14103	up
Solyc02g038740.2	0	3.68697	up
Solyc02g061770.2	0	4.11706	up
Solyc02g062390.2	0	3.07507	up
Solyc02g063520.2	0	3.50508	up
Solyc02g064830.2	0	4.69623	up
Solyc02g065090.2	0	4.92876	up
Solyc02g065540.1	0	4.52799	up
Solyc02g070110.1	0	4.04732	up
Solyc02g071560.2	0	4.21453	up
Solyc02g071820.2	0	2.73002	up
Solyc02g077290.1	0	3.72343	up
Solyc02g077370.1	0	3.59277	up
Solyc02g077570.1	0	4.3983	up
Solyc02g080040.2	0	2.40804	up
Solyc02g080920.1	0	5.67532	up
Solyc02g082450.2	0	3.77562	up
Solyc02g082920.2	0	3.67104	up
Solyc02g084800.2	0	2.56355	up
Solyc02g086210.2	0	3.14167	up
Solyc02g088160.2	0	4.2941	up
Solyc02g090490.2	0	2.53278	up
Solyc02g094270.1	0	7.09092	up
Solyc03g007890.2	0	2.96325	up
Solyc03g019690.1	0	3.00113	up
Solyc03g020010.1	0	2.3879	up
Solyc03g025670.2	0	3.801	up
Solyc03g034360.2	0	4.23506	up
Solyc03g043700.2	0	3.38073	up
Solyc03g078490.2	0	3.05264	up
Solyc03g098100.2	0	7.25578	up
Solyc03g098730.1	0	3.39358	up
Solyc03g098740.1	0	5.27288	up
Solyc03g115060.2	0	2.83037	up
Solyc03g115610.2	0	2.45617	up
Solyc03g116700.2	0	3.06793	up
Solyc03g117630.1	0	2.44606	up
Solyc03g120260.2	0	3.23081	up
Solyc03g123540.2	0	4.54374	up
Solyc04g009440.2	0	2.33975	up
Solyc04g025530.2	0	4.29573	up
Solyc04g040130.1	0	4.0465	up
Solyc04g054950.2	0	3.94753	up
Solyc04g064870.2	0	3.45774	up
Solyc04g071590.1	0	5.11044	up
Solyc04g071600.2	0	2.9504	up
Solyc04g071770.2	0	3.75836	up
Solyc04g071890.2	0	3.12172	up
Solyc04g072070.2	0	3.25884	up
Solyc04g072280.2	0	6.66679	up
Solyc04g078290.2	0	3.17499	up
Solyc04g078460.2	0	4.11143	up
Solyc04g078660.1	0	3.0627	up
Solyc04g083140.1	0	6.08585	up
Solyc05g014280.2	0	2.99848	up
Solyc05g015850.2	0	3.58775	up
Solyc05g021390.2	0	3.85224	up
Solyc05g046310.2	0	2.52942	up
Solyc05g050350.1	0	4.88509	up
Solyc05g052280.2	0	2.55279	up
Solyc05g052670.1	0	3.76961	up
Solyc05g054380.1	0	6.25276	up
Solyc06g005100.2	0	2.84087	up
Solyc06g035960.2	0	3.55982	up
Solyc06g036290.2	0	3.1817	up
Solyc06g050140.1	0	3.29094	up
Solyc06g066110.1	0	3.51284	up
Solyc06g066230.2	0	6.5759	up
Solyc06g072430.1	0	4.60446	up
Solyc06g082420.2	0	6.5735	up
Solyc07g005380.2	0	4.93524	up
Solyc07g006480.2	0	3.69435	up
Solyc07g009080.2	0	6.06637	up
Solyc07g009100.2	0	4.04074	up
Solyc07g009500.1	0	3.0607	up
Solyc07g009510.1	0	4.9	up
Solyc07g040710.2	0	2.64177	up
Solyc07g048070.2	0	3.63823	up
Solyc07g049530.2	0	2.48926	up
Solyc07g052120.2	0	4.32434	up
Solyc07g052370.2	0	8.07153	up
Solyc07g056200.2	0	2.68782	up
Solyc07g056510.2	0	5.73602	up
Solyc07g062480.1	0	2.8147	up
Solyc07g063700.1	0	6.61506	up
Solyc08g007460.2	0	3.36517	up
Solyc08g007790.2	0	2.74128	up
Solyc08g029000.2	0	3.18448	up
Solyc08g059710.2	0	2.83846	up
Solyc08g060920.2	0	2.68966	up
Solyc08g062340.2	0	3.57729	up
Solyc08g068710.1	0	3.98642	up
Solyc08g074260.2	0	6.10839	up
Solyc08g075550.2	0	3.77892	up
Solyc08g077330.2	0	5.92161	up
Solyc08g077910.2	0	2.99286	up
Solyc08g078180.1	0	5.24739	up
Solyc08g078700.2	0	3.55193	up
Solyc08g079900.1	0	4.16308	up
Solyc08g080620.1	0	7.82084	up
Solyc09g059430.2	0	2.50783	up
Solyc09g065660.2	0	4.85645	up
Solyc09g066400.1	0	6.5251	up
Solyc09g075820.2	0	2.88782	up
Solyc09g090990.2	0	4.9519	up
Solyc09g091000.2	0	4.30761	up
Solyc09g091670.2	0	5.75641	up
Solyc10g012370.2	0	2.49068	up
Solyc10g051120.1	0	4.07967	up
Solyc10g076190.1	0	4.68969	up
Solyc10g083890.1	0	2.98387	up
Solyc10g084170.1	0	4.02667	up
Solyc10g084960.1	0	2.83033	up
Solyc10g085010.1	0	3.31629	up
Solyc10g086690.1	0	2.59201	up
Solyc11g006030.1	0	4.1475	up
Solyc11g006540.1	0	2.50597	up
Solyc11g011340.1	0	3.68488	up
Solyc11g018800.1	0	3.08351	up
Solyc11g069640.1	0	4.03121	up
Solyc11g071830.1	0	3.04113	up
Solyc11g072140.1	0	6.14921	up
Solyc12g006530.1	0	3.81036	up
Solyc12g006840.1	0	3.74023	up
Solyc12g014010.1	0	3.35376	up
Solyc12g057070.1	0	3.40421	up
Solyc12g088940.1	0	2.79897	up
Solyc12g099130.1	0	4.52204	up
Solyc12g100270.1	0	3.00969	up
Solyc02g071970.1	1.11e-16	3.2488	up
Solyc02g078900.2	1.11e-16	2.32289	up
Solyc02g080080.2	1.11e-16	3.10109	up
Solyc05g009120.2	1.11e-16	3.29615	up
Solyc03g083480.2	2.22e-16	2.55756	up
Solyc03g097840.2	2.22e-16	2.40377	up
Solyc03g118000.1	2.22e-16	5.8357	up
Solyc04g074780.2	2.22e-16	2.51726	up
Solyc12g005850.1	2.22e-16	2.3286	up
Solyc10g012080.2	3.33e-16	2.36885	up
Solyc06g005820.2	4.44e-16	2.91312	up
Solyc11g007500.1	4.44e-16	3.21309	up
Solyc07g009060.2	5.55e-16	3.43257	up
Solyc08g067610.2	5.55e-16	2.39406	up
Solyc09g011520.2	5.55e-16	2.26059	up
Solyc09g011590.2	5.55e-16	2.26664	up
Solyc08g082110.2	6.66e-16	2.3771	up
Solyc09g098160.2	6.66e-16	2.47031	up
Solyc01g005160.2	9.99e-16	2.69906	up
Solyc04g057830.1	9.99e-16	3.51513	up
Solyc09g011550.2	9.99e-16	2.5273	up
Solyc10g086280.1	9.99e-16	2.26548	up
Solyc07g063730.1	1.11e-15	4.01524	up
Solyc06g076160.2	1.22e-15	3.17648	up
Solyc01g101210.2	1.44e-15	5.74981	up
Solyc02g094400.2	1.44e-15	2.27986	up
Tomato_newGene_1031	1.67e-15	2.63821	up
Solyc02g079540.1	1.78e-15	3.34245	up
Solyc10g084400.1	2.11e-15	2.22165	up
Solyc01g005390.2	2.22e-15	2.35287	up
Solyc11g007770.1	2.66e-15	2.25872	up
Solyc02g080930.1	3e-15	5.71397	up
Solyc01g107830.2	3.22e-15	3.03074	up
Solyc03g007380.1	4e-15	4.09736	up
Solyc04g040180.2	4.88e-15	2.20312	up
Solyc05g053600.2	5.11e-15	2.77524	up
Solyc10g079860.1	5.44e-15	2.33089	up
Tomato_newGene_227	5.77e-15	4.44759	up
Solyc01g066970.2	5.88e-15	2.621	up
Solyc01g109120.2	6.77e-15	2.51855	up
Solyc10g081970.1	7.22e-15	2.33759	up
Solyc03g082520.1	7.77e-15	2.67532	up
Solyc11g007490.1	1.01e-14	4.05802	up
Solyc01g091250.2	1.1e-14	2.67234	up
Solyc08g080540.2	1.27e-14	2.2336	up
Solyc12g100250.1	1.37e-14	4.04466	up
Solyc11g068940.1	1.52e-14	3.53543	up
Solyc09g089580.2	1.53e-14	2.29611	up
Solyc02g068680.1	1.99e-14	2.28541	up
Solyc01g090890.2	2.1e-14	4.18794	up
Solyc01g106830.2	2.72e-14	2.64916	up
Solyc07g007330.1	2.93e-14	3.87835	up
Solyc08g068680.2	2.95e-14	2.1681	up
Solyc03g025720.2	3.74e-14	2.14146	up
Solyc09g011620.1	4.61e-14	2.52063	up
Solyc09g014990.2	7.18e-14	2.14382	up
Solyc08g014010.2	8.3e-14	2.84242	up
Solyc02g087070.2	1.03e-13	2.1929	up
Tomato_newGene_223	1.21e-13	2.14958	up
Solyc11g005860.1	1.3e-13	4.5705	up
Solyc07g048060.1	1.48e-13	2.74856	up
Solyc08g080130.2	1.51e-13	2.12968	up
Solyc03g098010.2	1.54e-13	4.09915	up
Solyc12g005720.1	1.55e-13	2.50994	up
Solyc11g073060.1	1.82e-13	2.49012	up
Solyc07g007060.1	2.53e-13	5.49917	up
Solyc05g051530.2	2.55e-13	2.16461	up
Solyc06g074140.1	2.71e-13	4.53553	up
Solyc11g044840.1	2.71e-13	4.53553	up
Solyc10g055820.1	3.38e-13	2.18709	up
Solyc05g039950.1	3.47e-13	3.65841	up
Solyc01g095140.2	3.57e-13	2.08143	up
Solyc11g067000.1	3.63e-13	2.87238	up
Solyc10g007880.2	3.74e-13	3.12938	up
Solyc08g083280.2	4.17e-13	2.05618	up
Tomato_newGene_931	5.63e-13	3.45758	up
Solyc10g050730.1	5.83e-13	5.45643	up
Solyc03g042560.1	6.5e-13	2.0369	up
Solyc02g083850.2	6.68e-13	2.19501	up
Solyc04g011440.2	7.23e-13	2.03416	up
Solyc02g089140.2	7.44e-13	2.7764	up
Solyc02g081690.1	7.7e-13	2.0821	up
Solyc09g007020.1	7.7e-13	3.09912	up
Solyc09g059040.2	8.07e-13	2.02889	up
Solyc07g056470.2	8.14e-13	2.04514	up
Solyc02g077040.2	8.63e-13	2.23811	up
Solyc06g061210.2	8.92e-13	3.85874	up
Solyc03g033790.2	8.98e-13	3.3635	up
Solyc04g072000.2	9.88e-13	2.06451	up
Solyc05g050130.2	1.16e-12	2.05623	up
Solyc02g080830.1	1.19e-12	2.66707	up
Solyc11g030730.1	1.22e-12	2.47095	up
Solyc06g062420.2	1.24e-12	3.84339	up
Solyc01g106630.2	1.25e-12	2.0143	up
Solyc08g079870.1	1.36e-12	2.06645	up
Solyc10g055200.1	1.36e-12	2.07969	up
Solyc08g068690.1	1.62e-12	2.01687	up
Solyc06g076020.2	1.68e-12	2.02648	up
Solyc06g069130.2	1.7e-12	2.63728	up
Solyc02g068670.1	1.79e-12	4.80938	up
Solyc12g045020.1	1.79e-12	2.83264	up
Solyc07g056500.2	1.8e-12	2.01883	up
Solyc07g008110.2	2.09e-12	2.06119	up
Solyc03g094020.2	2.16e-12	4.17431	up
Solyc03g098670.1	2.16e-12	4.17431	up
Solyc12g011090.1	2.3e-12	2.77394	up
Solyc05g016060.2	2.32e-12	2.00735	up
Solyc08g006330.2	2.41e-12	2.06452	up
Solyc07g042230.1	2.43e-12	3.09443	up
Solyc04g071570.2	2.45e-12	1.99246	up
Solyc10g086710.1	2.57e-12	2.18163	up
Solyc09g011870.1	2.88e-12	2.26101	up
Solyc07g008120.2	3.63e-12	2.11246	up
Solyc05g053620.2	3.92e-12	2.02964	up
Solyc01g105630.2	4.26e-12	3.02593	up
Solyc10g007280.2	4.53e-12	2.01535	up
Solyc00g048510.2	6.37e-12	2.19414	up
Solyc09g074840.2	7.08e-12	1.95785	up
Solyc12g013620.1	7.44e-12	2.06631	up
Solyc03g114160.1	7.66e-12	2.27172	up
Solyc01g107820.2	7.78e-12	1.95799	up
Solyc06g063210.2	8.21e-12	2.57362	up
Solyc02g084780.2	8.69e-12	1.95634	up
Solyc08g065710.1	9.26e-12	3.74772	up
Solyc12g005380.1	9.36e-12	3.19382	up
Solyc07g054830.2	9.86e-12	1.97591	up
Solyc06g075100.2	1.02e-11	2.44235	up
Solyc03g115230.2	1.03e-11	1.94223	up
Solyc02g087210.2	1.08e-11	1.94212	up
Solyc10g055740.1	1.15e-11	2.15167	up
Solyc02g092860.2	1.16e-11	2.3318	up
Solyc10g050690.1	1.17e-11	5.296	up
Solyc11g068620.1	1.27e-11	2.45426	up
Solyc10g086680.1	1.37e-11	3.88567	up
Solyc02g079170.2	1.54e-11	1.99203	up
Solyc06g073760.2	1.54e-11	2.45738	up
Solyc04g054690.2	1.56e-11	1.93045	up
Solyc02g068460.1	1.66e-11	2.24175	up
Solyc06g076300.2	1.66e-11	2.08833	up
Solyc07g062490.1	1.91e-11	1.94507	up
Solyc01g112040.2	1.96e-11	2.08835	up
Solyc03g080190.2	1.99e-11	1.94181	up
Solyc12g008960.1	2.13e-11	1.93241	up
Solyc09g014910.2	2.27e-11	3.09546	up
Solyc09g098000.2	2.4e-11	2.80646	up
Solyc01g007000.2	2.71e-11	2.1826	up
Solyc04g074950.2	2.81e-11	1.93436	up
Solyc07g043310.2	2.87e-11	1.90835	up
Solyc09g007860.2	2.95e-11	2.14411	up
Solyc04g048900.2	2.96e-11	1.93246	up
Solyc08g077900.2	2.97e-11	1.95668	up
Solyc09g090970.2	3.05e-11	3.35737	up
Solyc08g006470.2	3.38e-11	1.90285	up
Solyc03g121900.1	3.47e-11	2.36435	up
Solyc08g060970.2	3.73e-11	2.07609	up
Solyc01g100000.2	3.79e-11	3.12941	up
Solyc11g039980.1	3.81e-11	2.10145	up
Solyc10g055760.1	3.9e-11	2.1648	up
Solyc02g080070.2	3.97e-11	2.04938	up
Solyc05g016310.1	4.04e-11	2.03034	up
Solyc10g076210.1	4.1e-11	1.89424	up
Tomato_newGene_660	4.73e-11	4.63565	up
Solyc08g007830.1	4.94e-11	2.45715	up
Solyc05g007900.2	5.01e-11	2.1153	up
Solyc03g082530.1	5.21e-11	2.21065	up
Solyc03g006620.2	5.75e-11	2.0542	up
Solyc01g010430.2	6.58e-11	1.89873	up
Solyc05g010020.2	7.2e-11	4.61239	up
Solyc02g078400.2	7.73e-11	2.56309	up
Solyc12g049030.1	7.74e-11	3.31229	up
Solyc01g096730.2	8.1e-11	1.92799	up
Solyc03g114360.2	8.6e-11	1.87949	up
Solyc04g011540.2	8.67e-11	2.59783	up
Solyc09g082270.2	8.79e-11	1.87217	up
Solyc07g041940.2	9.6e-11	1.9106	up
Solyc11g066100.1	9.68e-11	1.86736	up
Solyc06g072840.2	9.77e-11	1.97684	up
Solyc03g025330.2	1.08e-10	2.84121	up
Solyc02g085300.2	1.16e-10	2.36264	up
Solyc07g055630.2	1.16e-10	2.29758	up
Solyc09g097760.2	1.19e-10	2.3413	up
Solyc01g066720.2	1.4e-10	1.8543	up
Solyc06g053260.1	1.57e-10	3.06199	up
Solyc12g009220.1	1.61e-10	1.97647	up
Solyc05g009650.2	1.67e-10	1.99848	up
Solyc03g005260.2	1.69e-10	1.84515	up
Solyc03g093890.2	1.79e-10	2.27932	up
Solyc01g102900.2	1.82e-10	1.89672	up
Solyc11g071750.1	1.88e-10	1.96921	up
Solyc12g042480.1	1.98e-10	1.8833	up
Solyc02g092150.2	2.1e-10	1.94123	up
Solyc04g054660.1	2.25e-10	2.07891	up
Solyc09g083060.2	2.31e-10	1.91972	up
Solyc01g102960.2	2.35e-10	1.90113	up
Solyc01g086660.2	2.52e-10	2.01103	up
Solyc03g121040.2	2.77e-10	1.91824	up
Solyc03g118970.2	2.91e-10	1.83508	up
Solyc09g082280.2	3.05e-10	1.82444	up
Solyc11g071440.1	3.19e-10	2.02253	up
Solyc01g111250.2	3.2e-10	1.89922	up
Solyc07g056320.2	3.48e-10	2.01907	up
Solyc05g016690.2	3.67e-10	2.53351	up
Solyc11g021060.1	4.06e-10	2.05503	up
Solyc09g075700.1	4.23e-10	5.08774	up
Solyc06g051930.2	4.47e-10	2.14291	up
Solyc10g081980.1	5.1e-10	1.83309	up
Solyc04g005050.1	5.52e-10	1.80892	up
Solyc09g064820.1	6.15e-10	2.05408	up
Solyc02g086700.2	6.2e-10	2.38872	up
Solyc10g083290.1	6.23e-10	1.85348	up
Solyc02g091990.2	6.25e-10	1.98467	up
Solyc02g090770.1	6.85e-10	2.50503	up
Solyc11g011330.1	7.32e-10	1.81633	up
Solyc06g050440.2	7.42e-10	1.93681	up
Solyc03g111300.1	7.63e-10	2.4801	up
Solyc01g068630.2	8.66e-10	2.02697	up
Solyc02g092120.2	9.58e-10	3.10573	up
Solyc04g016470.2	1.11e-09	2.2648	up
Solyc08g008280.2	1.16e-09	1.79182	up
Solyc08g068730.1	1.21e-09	1.80961	up
Tomato_newGene_649	1.22e-09	2.69043	up
Solyc08g007810.2	1.27e-09	2.18729	up
Solyc01g107740.2	1.35e-09	1.79609	up
Solyc09g011510.2	1.36e-09	1.81851	up
Solyc06g071070.1	1.51e-09	1.99775	up
Solyc02g090500.2	1.57e-09	2.04036	up
Solyc04g007880.2	1.57e-09	1.80092	up
Solyc04g079400.2	1.61e-09	1.92396	up
Solyc01g073890.2	1.62e-09	2.26944	up
Solyc01g105370.2	1.66e-09	1.7654	up
Solyc03g005210.2	1.77e-09	1.82096	up
Solyc02g083880.2	1.79e-09	1.78191	up
Solyc10g079930.1	1.93e-09	1.77079	up
Solyc03g046380.1	1.98e-09	2.07984	up
Solyc02g031990.1	2.26e-09	4.05727	up
Solyc12g056180.1	2.29e-09	2.99051	up
Solyc09g005090.1	2.59e-09	2.65376	up
Solyc01g086730.2	2.65e-09	2.15494	up
Solyc03g111170.2	2.68e-09	1.9767	up
Solyc04g079250.2	2.73e-09	4.97113	up
Solyc12g057160.1	2.78e-09	1.7621	up
Solyc01g079200.2	3.05e-09	1.87533	up
Solyc08g069060.2	3.18e-09	1.83989	up
Solyc01g112220.2	3.39e-09	1.79607	up
Solyc01g106060.2	3.55e-09	1.7606	up
Solyc07g009070.2	4.35e-09	3.76818	up
Solyc12g056590.1	4.5e-09	2.00732	up
Solyc09g061840.2	4.68e-09	1.72271	up
Solyc01g112070.2	5e-09	1.8722	up
Solyc04g077230.1	5.1e-09	2.11084	up
Solyc07g045340.2	5.1e-09	1.71909	up
Solyc10g050880.1	5.16e-09	3.18642	up
Solyc02g084790.2	5.55e-09	1.74733	up
Solyc02g085660.1	6.04e-09	1.77606	up
Solyc02g090400.2	6.23e-09	1.83012	up
Solyc09g092500.1	6.61e-09	1.70872	up
Solyc01g087020.2	6.98e-09	1.74495	up
Solyc03g025640.1	7.07e-09	4.90909	up
Solyc03g097570.2	7.36e-09	2.07387	up
Solyc07g009050.2	7.53e-09	3.27046	up
Solyc03g096670.2	7.6e-09	1.7301	up
Solyc10g045420.1	7.73e-09	1.71976	up
Solyc03g116530.2	8.17e-09	1.72683	up
Solyc05g008820.2	8.19e-09	1.72477	up
Solyc01g100010.2	8.34e-09	1.81477	up
Solyc10g080010.1	8.34e-09	1.74951	up
Solyc09g075330.2	8.83e-09	1.75701	up
Solyc05g006390.1	9.26e-09	1.70785	up
Solyc07g056430.2	9.29e-09	1.70489	up
Solyc01g105190.2	9.52e-09	1.99173	up
Solyc02g090560.2	9.7e-09	1.95429	up
Solyc04g009900.2	9.78e-09	2.15627	up
Solyc03g120090.1	1e-08	1.7559	up
Solyc11g073080.1	1.02e-08	1.78942	up
Solyc05g050380.2	1.09e-08	1.79371	up
Solyc06g050630.2	1.11e-08	1.73554	up
Solyc02g079520.1	1.14e-08	2.21486	up
Solyc03g005500.1	1.14e-08	4.87704	up
Solyc09g098080.2	1.14e-08	4.87704	up
Solyc02g091700.2	1.18e-08	1.72696	up
Solyc02g085010.1	1.21e-08	1.88514	up
Solyc06g034370.1	1.27e-08	1.92863	up
Solyc03g096770.1	1.3e-08	1.74291	up
Solyc06g069570.2	1.37e-08	1.6833	up
Solyc09g061310.2	1.41e-08	1.68148	up
Solyc03g036480.1	1.45e-08	1.79795	up
Solyc08g016210.2	1.45e-08	1.99685	up
Solyc03g094120.2	1.47e-08	2.40139	up
Solyc06g074990.1	1.53e-08	3.23011	up
Solyc02g088090.1	1.56e-08	1.75357	up
Solyc11g005840.1	1.56e-08	2.1442	up
Solyc01g089890.2	1.57e-08	3.5028	up
Solyc08g007230.1	1.58e-08	3.35187	up
Solyc12g013690.1	1.58e-08	1.68489	up
Solyc01g104780.2	1.66e-08	2.52747	up
Solyc09g008970.1	1.81e-08	1.74933	up
Solyc03g083960.2	1.87e-08	1.70469	up
Solyc08g007820.1	1.9e-08	1.8729	up
Solyc06g076050.2	1.99e-08	1.66488	up
Solyc02g090970.1	2.06e-08	2.0028	up
Solyc09g011540.2	2.12e-08	2.61985	up
Solyc08g078650.2	2.3e-08	2.80589	up
Solyc02g078530.2	2.48e-08	1.87729	up
Solyc01g066700.2	2.84e-08	3.09022	up
Solyc11g005630.1	2.9e-08	1.69801	up
Solyc06g072330.2	2.96e-08	1.75065	up
Solyc04g079260.2	3.01e-08	4.81072	up
Solyc05g056400.2	3.01e-08	4.81072	up
Solyc10g008150.1	3.03e-08	1.87125	up
Solyc06g072220.1	3.23e-08	1.68873	up
Solyc07g007240.2	3.27e-08	1.68622	up
Solyc02g089610.1	3.49e-08	1.64559	up
Solyc04g053060.2	3.55e-08	1.64502	up
Solyc08g078070.2	3.58e-08	1.64635	up
Solyc06g066590.2	3.74e-08	1.82655	up
Solyc02g069060.2	3.95e-08	2.00307	up
Solyc10g081560.1	4.02e-08	1.637	up
Solyc04g077270.2	4.14e-08	1.64213	up
Solyc05g013710.2	4.31e-08	2.08608	up
Solyc11g051150.1	4.38e-08	3.87345	up
Solyc06g010030.2	4.44e-08	1.64759	up
Solyc03g112030.1	4.46e-08	3.16739	up
Solyc10g050970.1	4.54e-08	1.72003	up
Solyc01g068410.2	4.7e-08	1.76607	up
Solyc07g055710.2	4.74e-08	1.77577	up
Solyc07g051950.2	4.77e-08	2.57658	up
Solyc11g007030.1	4.92e-08	2.1208	up
Solyc11g011120.1	5.03e-08	1.75777	up
Solyc06g008620.1	5.05e-08	1.6279	up
Solyc07g008130.2	5.12e-08	1.6313	up
Solyc04g051820.2	5.13e-08	1.63398	up
Solyc09g013150.2	5.23e-08	1.68982	up
Solyc11g071990.1	5.27e-08	1.79303	up
Solyc02g093270.2	5.34e-08	1.62733	up
Solyc01g005800.2	5.39e-08	1.7112	up
Solyc07g045530.1	5.49e-08	2.49695	up
Solyc07g006420.1	5.71e-08	2.14899	up
Solyc10g017570.2	6.07e-08	1.97636	up
Solyc09g061280.2	6.14e-08	1.74045	up
Solyc12g042890.1	7.14e-08	1.68216	up
Solyc02g091730.1	7.16e-08	1.6439	up
Solyc03g116120.1	7.31e-08	1.77292	up
Solyc12g036320.1	7.4e-08	1.88157	up
Tomato_newGene_219	7.44e-08	3.40741	up
Solyc00g247300.2	7.56e-08	1.69512	up
Solyc03g117860.2	7.85e-08	1.66535	up
Solyc10g006710.2	8e-08	1.64976	up
Solyc01g006440.1	8.32e-08	4.17779	up
Solyc03g111280.1	9.2e-08	2.46908	up
Solyc02g091100.2	9.29e-08	1.60326	up
Solyc09g015020.1	9.36e-08	1.87058	up
Solyc00g007300.2	9.43e-08	1.66555	up
Solyc02g080890.2	9.78e-08	1.61316	up
Solyc08g016440.2	9.84e-08	2.03646	up
Solyc02g070090.1	1.01e-07	1.73628	up
Tomato_newGene_1137	1.01e-07	1.9121	up
Solyc04g064880.2	1.2e-07	1.6028	up
Solyc06g060710.2	1.29e-07	1.59832	up
Solyc02g062890.1	1.32e-07	4.70515	up
Solyc06g050570.1	1.32e-07	4.70515	up
Solyc12g088360.1	1.32e-07	1.65567	up
Solyc07g055990.2	1.39e-07	1.58935	up
Solyc09g092690.2	1.39e-07	1.92438	up
Solyc07g047800.2	1.41e-07	1.59403	up
Solyc03g096430.1	1.42e-07	1.70229	up
Solyc02g091380.1	1.49e-07	2.47704	up
Solyc07g054720.1	1.55e-07	2.64466	up
Solyc09g097960.2	1.56e-07	1.59471	up
Solyc02g094000.1	1.72e-07	1.58494	up
Solyc01g096430.2	1.8e-07	1.57647	up
Solyc09g075910.1	1.85e-07	1.80337	up
Solyc05g012850.2	2.01e-07	1.88955	up
Solyc05g041920.2	2.18e-07	1.71188	up
Solyc09g073030.2	2.31e-07	1.75727	up
Solyc08g068620.1	2.37e-07	1.82269	up
Solyc09g065750.2	2.44e-07	3.33148	up
Solyc08g065670.2	2.91e-07	1.90041	up
Solyc02g072000.2	2.92e-07	1.62611	up
Solyc08g066320.2	2.94e-07	2.04221	up
Solyc10g080460.1	2.95e-07	1.61609	up
Solyc07g053550.1	3.16e-07	1.55511	up
Solyc06g063180.1	3.28e-07	2.12942	up
Solyc03g020050.2	3.37e-07	4.07942	up
Solyc02g086270.2	3.44e-07	1.58847	up
Solyc03g116890.2	3.46e-07	1.55893	up
Solyc07g009030.2	3.63e-07	3.30526	up
Solyc03g120390.2	3.69e-07	1.87651	up
Solyc05g008220.2	3.81e-07	2.07808	up
Solyc09g005830.1	3.81e-07	1.6024	up
Solyc02g090110.2	4.2e-07	1.56702	up
Solyc01g098910.2	4.24e-07	1.54075	up
Solyc06g062920.2	4.24e-07	1.54182	up
Solyc02g093700.2	4.3e-07	1.64054	up
Solyc01g094170.2	4.4e-07	1.61633	up
Solyc02g032860.2	5.02e-07	1.534	up
Solyc06g082080.2	5.07e-07	1.54182	up
Solyc01g096420.2	5.36e-07	1.53184	up
Solyc01g100390.2	5.75e-07	2.06989	up
Solyc09g008010.2	5.95e-07	1.55184	up
Solyc06g035620.2	6e-07	1.55074	up
Solyc09g082390.1	6e-07	4.59123	up
Solyc10g011930.1	6.09e-07	3.6948	up
Solyc06g071060.1	6.26e-07	1.52813	up
Solyc07g063940.1	6.33e-07	1.52351	up
Solyc06g071820.2	6.53e-07	1.5261	up
Solyc07g009290.2	6.55e-07	1.60753	up
Solyc07g009040.2	6.6e-07	2.89904	up
Solyc08g078060.2	6.78e-07	1.52849	up
Solyc01g060240.2	6.88e-07	1.80874	up
Solyc05g052750.2	7.6e-07	1.67009	up
Solyc09g011670.2	7.73e-07	1.56091	up
Solyc01g112080.2	7.8e-07	1.56583	up
Solyc06g036410.1	8.06e-07	2.72489	up
Solyc06g083390.2	8.18e-07	1.51442	up
Solyc03g036470.1	8.65e-07	1.52993	up
Solyc06g060700.1	9.12e-07	1.6435	up
Solyc08g068390.2	9.13e-07	1.57057	up
Solyc02g093520.2	9.14e-07	1.50923	up
Solyc04g074680.1	9.42e-07	1.61107	up
Solyc12g005910.1	9.44e-07	1.51556	up
Solyc02g087890.2	9.66e-07	2.44555	up
Solyc03g096650.1	1e-06	4.55117	up
Solyc06g072460.1	1e-06	1.70731	up
Solyc01g104690.2	1.01e-06	1.50367	up
Solyc08g067360.2	1.01e-06	3.09107	up
Solyc02g079800.1	1.03e-06	2.13564	up
Solyc12g096960.1	1.04e-06	2.78357	up
Solyc01g066940.2	1.11e-06	1.5695	up
Solyc12g042600.1	1.18e-06	1.50061	up
Solyc06g005480.2	1.24e-06	1.54293	up
Solyc01g008500.2	1.26e-06	2.51993	up
Solyc06g065570.2	1.29e-06	1.51901	up
Solyc03g116590.2	1.31e-06	1.49237	up
Solyc03g116390.2	1.34e-06	1.76147	up
Solyc02g092820.2	1.35e-06	2.85288	up
Solyc01g007020.2	1.39e-06	1.55507	up
Solyc04g076970.2	1.39e-06	1.79826	up
Solyc04g077050.2	1.41e-06	1.49627	up
Solyc07g053420.2	1.49e-06	3.06484	up
Solyc08g067630.2	1.57e-06	1.88586	up
Solyc12g057060.1	1.62e-06	1.48515	up
Solyc04g024780.1	1.63e-06	2.61443	up
Solyc05g047530.2	1.63e-06	1.56001	up
Solyc10g018340.1	1.67e-06	4.50997	up
Tomato_newGene_206	1.68e-06	2.55439	up
Solyc04g074730.1	1.7e-06	1.48955	up
Solyc11g020330.1	1.71e-06	1.76262	up
Solyc06g035700.1	1.73e-06	1.53801	up
Solyc02g092580.2	1.76e-06	1.48051	up
Solyc01g091490.2	1.94e-06	1.88313	up
Solyc06g067980.2	1.95e-06	1.50911	up
Solyc01g107780.2	1.97e-06	1.47468	up
Solyc07g008140.2	2.15e-06	1.59237	up
Solyc04g079760.2	2.17e-06	1.79759	up
Solyc10g055800.1	2.17e-06	1.51947	up
Solyc03g082370.1	2.25e-06	1.48215	up
Solyc02g079530.2	2.33e-06	1.84853	up
Solyc08g078040.2	2.33e-06	1.59255	up
Solyc00g201160.2	2.39e-06	1.95309	up
Solyc06g075690.2	2.39e-06	1.46603	up
Solyc12g009770.1	2.44e-06	1.85381	up
Solyc10g051020.1	2.5e-06	1.48233	up
Solyc02g070640.2	2.6e-06	1.46423	up
Solyc01g109920.2	2.8e-06	1.90039	up
Solyc03g044180.1	2.81e-06	4.46755	up
Solyc09g091770.1	2.81e-06	4.46755	up
Solyc09g011560.2	2.83e-06	1.61699	up
Solyc01g009780.2	2.91e-06	1.49382	up
Solyc01g010660.2	2.93e-06	1.46496	up
Solyc11g011350.1	3.03e-06	1.85035	up
Solyc01g102290.2	3.04e-06	1.46386	up
Solyc01g010060.2	3.12e-06	1.61793	up
Solyc04g007320.1	3.23e-06	1.61826	up
Solyc09g089930.1	3.23e-06	1.96134	up
Solyc02g079150.1	3.24e-06	3.01092	up
Solyc06g082440.1	3.35e-06	1.45099	up
Solyc08g066310.1	3.43e-06	1.68582	up
Solyc10g006720.2	3.48e-06	2.03073	up
Solyc01g104770.2	3.5e-06	1.44933	up
Solyc06g073830.1	3.6e-06	1.47793	up
Solyc01g112050.2	3.63e-06	1.46235	up
Solyc10g078770.1	3.68e-06	3.56209	up
Solyc09g082300.2	3.69e-06	1.67848	up
Solyc05g056080.2	3.79e-06	1.47509	up
Solyc06g074530.1	3.84e-06	1.44949	up
Solyc09g082240.2	3.98e-06	1.82726	up
Solyc11g071740.1	4.06e-06	1.44244	up
Solyc11g072550.1	4.23e-06	1.44066	up
Solyc11g066800.1	4.49e-06	1.86434	up
Solyc04g081960.1	4.58e-06	2.03183	up
Solyc03g033840.2	4.78e-06	1.49908	up
Solyc08g036640.2	4.87e-06	2.04625	up
Solyc03g026050.2	4.91e-06	2.12946	up
Solyc10g054440.1	4.91e-06	1.4787	up
Solyc07g007130.1	4.94e-06	1.43578	up
Solyc12g006590.1	4.99e-06	1.5134	up
Solyc01g098590.2	5.05e-06	1.57195	up
Solyc02g076830.1	5.09e-06	1.44953	up
Solyc11g020230.1	5.37e-06	1.43784	up
Solyc11g017270.1	5.59e-06	1.44479	up
Solyc02g081190.2	5.6e-06	1.42796	up
Solyc07g054760.1	5.61e-06	1.83342	up
Solyc02g071950.1	5.65e-06	1.69087	up
Solyc03g119230.1	5.71e-06	1.50168	up
Solyc08g068610.2	5.72e-06	1.52903	up
Solyc02g092890.1	5.81e-06	3.52691	up
Solyc05g012660.1	5.81e-06	3.52691	up
Solyc12g044940.1	5.86e-06	1.42604	up
Solyc03g006610.2	5.96e-06	1.5259	up
Solyc02g094030.2	5.98e-06	1.42499	up
Solyc03g116100.2	6.1e-06	1.68259	up
Solyc04g074470.1	6.19e-06	1.44075	up
Solyc03g044900.2	6.24e-06	1.8188	up
Solyc07g066560.1	6.26e-06	2.11474	up
Solyc06g009040.2	6.46e-06	1.50867	up
Solyc08g066440.2	6.5e-06	1.42432	up
Solyc03g122350.2	6.53e-06	1.42256	up
Solyc07g009230.2	6.62e-06	1.42335	up
Solyc07g040890.1	6.7e-06	1.43052	up
Solyc01g079940.2	6.89e-06	1.42459	up
Solyc06g005520.2	7.06e-06	1.60083	up
Solyc03g113130.2	7.18e-06	1.43908	up
Solyc05g010470.2	7.24e-06	1.46442	up
Solyc10g075150.1	7.95e-06	1.42636	up
Solyc09g066350.1	8.01e-06	4.37878	up
Solyc12g055710.1	8.11e-06	2.73058	up
Tomato_newGene_899	8.13e-06	1.93511	up
Solyc08g078850.2	8.27e-06	1.4315	up
Solyc10g076480.1	8.27e-06	1.57025	up
Solyc04g074000.2	8.43e-06	1.81935	up
Solyc01g106390.2	8.6e-06	1.41777	up
Solyc03g034320.2	8.76e-06	1.4239	up
Solyc07g042590.2	8.88e-06	1.42342	up
Solyc08g077560.2	9.17e-06	1.45091	up
Solyc03g113040.2	9.31e-06	1.41523	up
Solyc02g020890.2	9.38e-06	1.46887	up
Solyc10g011910.2	9.47e-06	1.44333	up
Solyc11g009000.1	9.62e-06	1.46822	up
Solyc03g116030.2	9.74e-06	1.41773	up
Solyc11g068770.1	9.84e-06	1.43223	up
Solyc07g065660.2	9.85e-06	1.40799	up
Solyc11g011610.1	9.92e-06	1.44948	up
Solyc10g012170.2	9.99e-06	1.49404	up
Solyc01g088160.2	1.05e-05	1.67563	up
Solyc06g054630.1	1.05e-05	2.92606	up
Solyc02g093050.2	1.06e-05	1.41425	up
Solyc08g078510.2	1.06e-05	1.40731	up
Solyc11g011050.1	1.07e-05	1.49056	up
Solyc05g013640.1	1.14e-05	1.45365	up
Solyc04g011770.2	1.16e-05	1.81995	up
Solyc03g111510.2	1.19e-05	1.99257	up
Solyc02g093430.2	1.2e-05	1.45223	up
Solyc06g062540.2	1.2e-05	3.23522	up
Solyc10g086700.1	1.23e-05	1.50142	up
Solyc08g082440.2	1.24e-05	1.4438	up
Solyc07g041500.2	1.27e-05	1.88181	up
Solyc01g098610.2	1.29e-05	1.39014	up
Solyc09g075920.1	1.33e-05	1.69316	up
Solyc03g113380.2	1.38e-05	1.38866	up
Solyc09g092480.1	1.38e-05	1.39266	up
Solyc05g009040.2	1.41e-05	3.04494	up
Solyc02g031790.1	1.45e-05	3.45388	up
Solyc07g052790.1	1.45e-05	3.45388	up
Solyc04g049090.2	1.46e-05	1.40307	up
Solyc08g076390.2	1.49e-05	1.38857	up
Solyc01g100230.2	1.55e-05	1.48048	up
Solyc02g082910.2	1.56e-05	1.94134	up
Solyc07g018200.1	1.56e-05	2.89662	up
Solyc04g007580.1	1.59e-05	1.3805	up
Solyc05g018050.1	1.59e-05	2.23071	up
Solyc01g068000.2	1.6e-05	1.38017	up
Solyc12g056390.1	1.64e-05	2.77717	up
Solyc03g006080.2	1.65e-05	1.40457	up
Solyc01g008400.2	1.68e-05	1.87802	up
Solyc03g122340.2	1.73e-05	1.39478	up
Solyc03g007290.2	1.75e-05	1.71464	up
Tomato_newGene_666	1.76e-05	1.40038	up
Solyc07g056570.1	1.79e-05	1.45321	up
Solyc00g022100.1	1.83e-05	1.52251	up
Solyc02g077470.2	1.86e-05	1.3817	up
Solyc01g105280.2	1.89e-05	1.37428	up
Solyc09g074860.2	1.94e-05	1.47557	up
Solyc10g085860.1	1.95e-05	2.34187	up
Solyc08g080630.2	2.07e-05	1.36763	up
Solyc02g062460.2	2.08e-05	1.36834	up
Solyc11g010380.1	2.09e-05	1.36805	up
Solyc05g009550.2	2.1e-05	1.36987	up
Tomato_newGene_652	2.1e-05	2.21198	up
Solyc04g077810.1	2.12e-05	1.93916	up
Solyc05g011980.2	2.16e-05	1.38205	up
Solyc03g115930.1	2.24e-05	1.49021	up
Solyc03g113420.2	2.25e-05	1.44536	up
Solyc04g079120.2	2.27e-05	1.36433	up
Solyc05g009610.1	2.29e-05	1.43335	up
Solyc06g050950.2	2.31e-05	3.41593	up
Solyc07g020870.1	2.31e-05	3.41593	up
Solyc10g078220.1	2.31e-05	3.41593	up
Tomato_newGene_772	2.31e-05	3.41593	up
Solyc03g113070.2	2.34e-05	1.36202	up
Solyc07g006860.2	2.35e-05	1.49216	up
Solyc08g006740.2	2.49e-05	1.39642	up
Solyc09g011630.2	2.49e-05	1.37176	up
Solyc01g057770.2	2.5e-05	1.38141	up
Solyc01g080010.2	2.52e-05	1.36685	up
Solyc04g078350.1	2.53e-05	2.07628	up
Solyc11g042560.1	2.54e-05	1.662	up
Solyc05g013750.2	2.58e-05	1.36469	up
Solyc03g116190.1	2.6e-05	3.73625	up
Solyc07g065250.2	2.63e-05	1.42155	up
Solyc01g107540.2	2.64e-05	1.92543	up
Solyc06g063190.2	2.64e-05	1.92543	up
Solyc05g051350.1	2.65e-05	2.32066	up
Solyc02g083730.2	2.75e-05	1.86143	up
Solyc01g010220.2	2.82e-05	1.78758	up
Solyc11g062400.1	2.88e-05	1.57802	up
Solyc09g098310.2	2.99e-05	1.35514	up
Solyc10g081170.1	2.99e-05	1.37358	up
Solyc05g006830.2	3.02e-05	1.36839	up
Solyc06g069150.1	3.04e-05	1.39801	up
Solyc10g080770.1	3.04e-05	1.34992	up
Solyc02g084640.2	3.08e-05	1.36912	up
Solyc04g014290.1	3.16e-05	1.43941	up
Solyc04g077280.2	3.39e-05	1.8222	up
Solyc02g079510.2	3.48e-05	1.41025	up
Solyc04g025750.2	3.51e-05	2.72004	up
Solyc09g061620.2	3.59e-05	1.34266	up
Solyc02g086880.2	3.86e-05	1.39031	up
Solyc12g100260.1	3.97e-05	4.23446	up
Tomato_newGene_34	3.97e-05	4.23446	up
Solyc02g079570.2	4.26e-05	1.3505	up
Solyc06g084190.2	4.42e-05	2.12716	up
Solyc08g081240.2	4.45e-05	1.33407	up
Solyc01g109720.2	4.47e-05	1.40333	up
Solyc08g006150.2	4.5e-05	1.33828	up
Solyc05g025820.2	4.54e-05	1.59253	up
Solyc06g050250.1	4.71e-05	1.57727	up
Solyc05g008990.2	4.73e-05	1.64984	up
Solyc04g007250.1	4.79e-05	2.5184	up
Solyc01g097880.2	4.87e-05	1.32916	up
Solyc01g009810.2	4.99e-05	1.96043	up
Solyc05g006870.2	4.99e-05	1.96043	up
Solyc01g005760.2	5.38e-05	1.54974	up
Solyc04g077620.1	5.41e-05	1.50284	up
Solyc03g083010.2	5.44e-05	1.36454	up
Solyc01g095150.2	5.51e-05	1.34775	up
Solyc06g061080.2	5.86e-05	2.36975	up
Solyc01g103580.2	6.07e-05	1.37598	up
Solyc02g094110.1	6.22e-05	1.70963	up
Solyc10g005630.2	6.24e-05	1.33119	up
Solyc01g057910.2	6.34e-05	1.86913	up
Solyc12g036390.1	6.38e-05	1.53621	up
Solyc07g043150.1	6.41e-05	1.35961	up
Solyc06g051970.2	6.52e-05	1.7464	up
Solyc07g066080.2	6.56e-05	1.33826	up
Solyc01g109890.2	6.58e-05	1.31881	up
Solyc08g006410.2	6.79e-05	1.65528	up
Solyc05g015840.2	6.81e-05	1.3595	up
Solyc03g065260.2	6.83e-05	4.18296	up
Solyc07g016020.1	6.83e-05	4.18296	up
Solyc08g045710.1	6.83e-05	4.18296	up
Solyc01g096200.2	6.86e-05	1.31041	up
Solyc06g068520.2	6.87e-05	1.4946	up
Solyc02g093230.2	6.93e-05	1.50833	up
Solyc02g069250.2	7.01e-05	1.5238	up
Solyc01g080030.1	7.05e-05	3.64749	up
Solyc09g092520.2	7.05e-05	1.31431	up
Solyc07g055690.1	7.24e-05	1.50286	up
Solyc09g010850.2	7.29e-05	1.32146	up
Solyc02g071780.2	7.84e-05	1.30702	up
Solyc04g016420.2	8.01e-05	1.4572	up
Solyc02g086310.1	8.02e-05	1.97387	up
Solyc02g079500.2	8.31e-05	1.31009	up
Solyc00g206460.1	8.6e-05	1.29947	up
Solyc01g086670.2	8.67e-05	1.44272	up
Solyc08g068870.2	8.83e-05	1.68769	up
Solyc10g011740.2	8.89e-05	1.2972	up
Solyc08g076710.2	8.92e-05	2.04706	up
Solyc02g062550.2	9.02e-05	1.3014	up
Solyc03g116340.2	9.19e-05	1.29658	up
Solyc03g058890.2	9.38e-05	3.29568	up
Solyc08g077070.2	9.38e-05	3.29568	up
Solyc11g006240.1	9.38e-05	3.29568	up
Solyc12g056360.1	9.46e-05	1.67445	up
Solyc09g011490.2	0.000101216	1.5451	up
Solyc08g068770.1	0.000101605	1.318	up
Solyc10g008730.2	0.000107032	1.3607	up
Solyc02g082950.2	0.000107074	1.59399	up
Solyc01g100240.2	0.000107561	1.3936	up
Solyc02g080850.1	0.000107885	3.05471	up
Solyc05g054650.1	0.000113808	1.8845	up
Solyc11g011800.1	0.000114004	2.87706	up
Solyc10g006540.2	0.000115125	1.28506	up
Solyc08g048420.2	0.00011566	1.53704	up
Solyc12g006820.1	0.000118	4.12955	up
Solyc03g112970.1	0.000126154	1.85835	up
Solyc02g077060.1	0.000126861	1.49925	up
Solyc03g115970.1	0.000128107	1.71402	up
Solyc02g081450.2	0.0001295	1.29991	up
Solyc06g084320.1	0.000130349	1.4232	up
Solyc03g114350.1	0.000132575	1.36333	up
Solyc01g100370.2	0.000137029	1.27773	up
Solyc08g079700.1	0.000140059	1.29155	up
Solyc11g069940.1	0.000144627	1.57532	up
Solyc08g067160.2	0.000144693	1.33633	up
Solyc03g111100.1	0.00014492	1.32572	up
Solyc03g114600.2	0.000146034	1.28477	up
Solyc01g073690.2	0.000148508	1.27225	up
Solyc07g042170.2	0.000149932	1.27814	up
Solyc06g051950.2	0.000150793	2.51037	up
Solyc06g069740.1	0.000150793	2.51037	up
Solyc12g099140.1	0.000150793	2.51037	up
Solyc08g067340.2	0.000150799	1.62819	up
Solyc09g005560.2	0.000151899	2.07356	up
Solyc11g056620.1	0.000151988	1.58467	up
Solyc11g072920.1	0.00015405	1.47065	up
Solyc06g036170.1	0.000156836	1.26865	up
Solyc11g010250.1	0.0001572	1.27034	up
Solyc11g056310.1	0.00015883	1.64142	up
Solyc02g086590.2	0.000160177	1.28446	up
Solyc05g012180.2	0.000170625	2.70616	up
Solyc05g005460.2	0.000171655	1.34693	up
Solyc08g022240.1	0.00017491	1.70483	up
Solyc03g031910.2	0.000176981	1.67166	up
Solyc10g085880.1	0.000179214	1.26266	up
Solyc03g114950.2	0.000185589	1.28268	up
Solyc09g064930.2	0.000189956	1.29334	up
Solyc08g079420.2	0.000193358	1.5399	up
Solyc12g096710.1	0.000193433	1.34108	up
Solyc01g008420.2	0.000194969	1.41193	up
Solyc07g061720.2	0.000198231	1.70825	up
Solyc01g103030.2	0.000204527	1.54758	up
Solyc01g107390.2	0.000206001	1.32651	up
Solyc03g043880.2	0.00020997	1.47979	up
Solyc03g026230.1	0.00021164	1.26605	up
Solyc04g082960.1	0.000212468	1.28284	up
Solyc02g067740.2	0.000218144	1.30797	up
Solyc12g011030.1	0.000219854	1.2771	up
Solyc06g071990.2	0.000225728	1.25063	up
Solyc01g099370.2	0.000227212	1.29241	up
Solyc09g091840.2	0.000231592	1.28268	up
Solyc05g008360.1	0.000234736	1.35405	up
Solyc01g080570.2	0.000239916	1.73411	up
Solyc01g108880.2	0.000239916	1.73411	up
Solyc02g092450.2	0.000240402	1.30731	up
Solyc08g080940.2	0.000241422	1.29353	up
Solyc07g062700.2	0.000246254	1.2811	up
Solyc05g006850.2	0.000248062	1.24869	up
Solyc09g011500.2	0.000251177	1.32086	up
Solyc06g075780.1	0.000252091	1.24455	up
Solyc05g005160.2	0.000253868	1.2588	up
Solyc03g093140.2	0.000254382	1.24654	up
Solyc03g082690.2	0.000255916	1.37619	up
Solyc03g122190.2	0.000258601	1.24763	up
Solyc07g043510.2	0.000259525	1.25887	up
Solyc03g116510.1	0.000265167	2.80402	up
Solyc08g062490.2	0.000267514	2.03144	up
Solyc08g075540.2	0.000269406	1.25516	up
Solyc01g104800.2	0.000270336	1.6337	up
Solyc07g056000.2	0.000271833	1.27225	up
Solyc03g007080.2	0.000271945	1.78721	up
Solyc09g074280.1	0.000275434	1.43529	up
Solyc08g078090.1	0.000276703	1.24023	up
Solyc09g011570.2	0.000279451	1.33422	up
Solyc08g075320.2	0.000279575	1.27156	up
Solyc01g057460.2	0.000281353	1.40127	up
Solyc01g102680.2	0.000281769	1.24528	up
Solyc06g050810.2	0.000285274	1.3319	up
Solyc04g008100.1	0.000285502	1.24056	up
Solyc05g008510.2	0.000286373	1.46834	up
Solyc08g078550.1	0.000286571	1.52037	up
Solyc01g102490.2	0.000287567	1.29296	up
Solyc12g019890.1	0.000290289	1.27565	up
Solyc06g074670.2	0.000290681	1.25357	up
Solyc07g066260.2	0.000290719	1.23833	up
Solyc08g008420.2	0.00029408	1.76498	up
Solyc09g090980.2	0.000298826	1.2478	up
Solyc07g055640.1	0.000301253	1.55397	up
Solyc03g095650.2	0.000303926	2.24315	up
Solyc03g112330.2	0.000311348	1.40501	up
Solyc01g067000.2	0.000319518	1.23274	up
Solyc03g122300.1	0.000323361	1.2331	up
Solyc02g068900.2	0.000327303	1.23569	up
Solyc05g009520.1	0.000337278	1.24173	up
Solyc01g007030.2	0.00034193	1.23793	up
Solyc08g065480.2	0.000342947	1.24022	up
Solyc12g005980.1	0.000345372	1.23651	up
Solyc09g074890.1	0.000345388	1.24802	up
Solyc02g080640.2	0.000345694	1.26139	up
Solyc02g071350.2	0.000347417	1.44834	up
Solyc06g068960.1	0.000347417	1.44834	up
Solyc11g006910.1	0.000353342	1.22948	up
Solyc05g050870.2	0.000356203	4.01641	up
Solyc07g064600.2	0.000356203	4.01641	up
Solyc08g065540.2	0.000356203	4.01641	up
Solyc10g047810.1	0.000356203	4.01641	up
Solyc12g013640.1	0.000356203	4.01641	up
Solyc03g071850.1	0.000359671	1.23499	up
Solyc11g063590.1	0.00036606	1.74947	up
Tomato_newGene_661	0.00036606	1.74947	up
Solyc09g090430.2	0.000367474	1.22475	up
Solyc04g011750.2	0.000372153	1.30999	up
Solyc03g117210.2	0.000373027	1.24125	up
Solyc08g068780.1	0.00037372	1.22386	up
Solyc01g091590.2	0.00037657	1.22768	up
Solyc06g007180.2	0.000379569	1.22492	up
Solyc02g090830.1	0.000388108	3.1645	up
Solyc02g071470.2	0.000390944	1.27953	up
Solyc01g008560.2	0.000392307	1.2346	up
Solyc03g082600.2	0.00039499	1.23389	up
Solyc04g016230.2	0.000400811	1.22155	up
Solyc01g097270.2	0.000402718	1.22684	up
Solyc01g067120.2	0.000407554	1.3281	up
Solyc08g007070.2	0.000408987	1.27281	up
Solyc12g096310.1	0.000414131	1.34553	up
Solyc02g093860.2	0.000415827	1.22144	up
Solyc04g007130.1	0.0004406	1.23912	up
Solyc11g017280.1	0.000456133	2.41828	up
Solyc07g053270.2	0.000458842	1.30277	up
Solyc10g019170.1	0.000464098	1.59703	up
Solyc09g082870.1	0.000487667	1.20972	up
Solyc01g096070.2	0.000490489	1.21541	up
Solyc02g094180.2	0.000491846	1.2106	up
Solyc10g054910.1	0.000527637	1.64084	up
Solyc11g015890.1	0.000527718	1.27441	up
Solyc09g065000.2	0.000529927	1.56126	up
Solyc11g017470.1	0.000555883	1.20302	up
Solyc07g049180.2	0.000562353	1.2033	up
Solyc04g077180.1	0.000582508	1.6114	up
Tomato_newGene_694	0.000582844	1.20194	up
Solyc09g082570.2	0.000596237	1.52958	up
Solyc02g080840.1	0.000622824	3.95632	up
Solyc07g063710.1	0.000622824	3.95632	up
Solyc09g089910.1	0.000622824	3.95632	up
Solyc12g100240.1	0.000622824	3.95632	up
Tomato_newGene_789	0.000622824	3.95632	up
Solyc07g049560.2	0.000628319	1.23432	up
Solyc12g057140.1	0.000650517	1.19669	up
Solyc07g017600.2	0.000659699	1.20336	up
Solyc02g077360.1	0.000660183	2.38623	up
Solyc05g025670.1	0.000685492	1.77568	up
Solyc03g096450.1	0.00068792	2.12301	up
Solyc11g066890.1	0.000699898	1.19573	up
Tomato_newGene_421	0.000720326	1.35502	up
Solyc06g068930.1	0.000724516	1.28069	up
Solyc06g071750.2	0.00074628	1.68229	up
Solyc01g111610.2	0.000775449	1.49055	up
Solyc02g071990.2	0.000779561	1.22133	up
Solyc02g082740.1	0.00078786	1.42861	up
Solyc02g064680.2	0.000791226	1.22947	up
Solyc02g062800.2	0.000795886	1.21937	up
Solyc02g088460.2	0.00081089	1.18403	up
Solyc12g013680.1	0.000818131	2.16149	up
Solyc08g074970.1	0.000829701	1.70615	up
Solyc06g075550.2	0.000830811	1.19751	up
Solyc08g079650.2	0.000832142	1.18324	up
Solyc01g107170.2	0.000833936	1.19701	up
Solyc10g078270.1	0.000834835	1.27312	up
Solyc05g013410.2	0.000839991	1.24659	up
Solyc04g074480.2	0.000858411	1.23286	up
Solyc03g117980.2	0.000862848	1.20133	up
Solyc04g005480.1	0.000883948	1.17923	up
Solyc02g088180.2	0.000909969	1.31107	up
Solyc04g079820.2	0.000912969	1.90324	up
Solyc04g054710.2	0.000927662	1.1838	up
Solyc05g041910.2	0.000929908	1.19696	up
Solyc03g111860.1	0.000947279	1.59882	up
Solyc01g087620.2	0.000958568	1.19697	up
Solyc03g093110.2	0.000968674	1.18368	up
Solyc02g077780.2	0.000970307	1.18213	up
Solyc10g005040.2	0.000979086	1.24036	up
Solyc09g075890.2	0.000984627	1.17465	up
Tomato_newGene_1263	0.000996389	1.86652	up
Solyc06g009140.2	0.00101123	1.21726	up
Solyc05g015470.1	0.00101421	1.2577	up
Solyc10g062160.1	0.00101841	1.52399	up
Solyc01g105620.2	0.00102501	1.57095	up
Solyc08g075970.2	0.00103488	1.20772	up
Solyc05g005050.2	0.00104612	1.26756	up
Solyc08g068350.2	0.00104787	1.22747	up
Solyc07g005090.2	0.00104975	1.16939	up
Solyc09g056390.1	0.00105128	1.51337	up
Solyc03g112060.2	0.00105916	1.17354	up
Solyc06g009110.2	0.00106175	1.18146	up
Solyc07g056420.2	0.00106957	1.18249	up
Solyc02g080010.2	0.00107569	2.03833	up
Solyc01g080890.2	0.00109362	3.89363	up
Solyc03g005470.2	0.00109575	1.16741	up
Solyc01g107400.2	0.00109732	1.31351	up
Solyc02g092240.2	0.00110044	1.27683	up
Solyc06g072110.2	0.00113956	1.16354	up
Solyc11g068710.1	0.00116461	1.30114	up
Solyc06g050980.2	0.00117972	1.16477	up
Solyc03g097180.2	0.00118268	1.16385	up
Solyc02g084900.2	0.00118334	1.16185	up
Solyc01g094330.2	0.00119571	1.24634	up
Solyc03g083680.1	0.00121169	1.22647	up
Solyc03g111720.2	0.00122299	1.16574	up
Solyc01g106610.2	0.00124499	1.15866	up
Solyc12g094650.1	0.00125846	1.3571	up
Solyc09g097990.1	0.00125876	1.3837	up
Solyc08g006750.2	0.00126705	1.16057	up
Solyc00g289230.1	0.00128116	1.2817	up
Solyc02g081390.2	0.00132426	1.16724	up
Solyc03g044100.2	0.0013407	1.20856	up
Solyc08g080900.2	0.00134697	1.1542	up
Solyc02g070580.1	0.00134975	1.21194	up
Solyc12g088370.1	0.00138677	1.1863	up
Solyc07g006800.1	0.00143583	1.18493	up
Solyc02g090980.1	0.00145196	2.64582	up
Solyc10g075170.1	0.00146438	2.0121	up
Solyc11g006500.1	0.00146639	1.14963	up
Solyc01g065980.2	0.00148008	1.15172	up
Solyc01g088690.2	0.00148683	1.16442	up
Solyc12g057150.1	0.00149351	1.15179	up
Solyc08g028780.1	0.00153141	1.22865	up
Solyc03g119250.2	0.00154256	1.1655	up
Solyc12g056410.1	0.00156573	1.14622	up
Solyc08g016150.1	0.00158836	1.58451	up
Solyc06g066500.1	0.00158924	1.75294	up
Solyc08g080290.2	0.00159555	1.15228	up
Solyc06g051940.2	0.00160866	1.40962	up
Solyc09g083360.2	0.00162427	1.9611	up
Solyc06g008760.1	0.00162661	1.50764	up
Solyc02g087330.2	0.00162695	1.14415	up
Solyc03g083730.1	0.00163778	1.18375	up
Solyc03g005040.1	0.0016579	2.22603	up
Solyc01g007110.2	0.0016858	1.14444	up
Solyc12g096130.1	0.00169647	1.55554	up
Solyc05g006780.2	0.00171959	1.14943	up
Solyc02g088630.2	0.00171969	1.1442	up
Solyc09g010980.1	0.00175156	1.61781	up
Solyc02g083460.2	0.00175932	1.13948	up
Solyc05g053960.2	0.00176651	1.14235	up
Solyc02g089290.2	0.00178061	1.15111	up
Solyc02g078250.2	0.00182084	1.18502	up
Solyc07g007320.1	0.00185175	1.23111	up
Solyc02g087420.1	0.00185325	1.67931	up
Solyc09g064780.2	0.0018693	1.1964	up
Solyc07g041750.2	0.00191884	1.13923	up
Solyc02g067790.2	0.00192827	3.82808	up
Solyc03g121390.1	0.00192827	3.82808	up
Solyc07g009090.2	0.00192827	3.82808	up
Solyc02g078960.2	0.00193272	1.14222	up
Solyc01g097610.2	0.00194151	1.56916	up
Solyc05g009340.1	0.00194151	1.56916	up
Solyc12g099790.1	0.00194364	1.49441	up
Solyc10g005480.2	0.0019723	1.1334	up
Solyc00g021630.1	0.00200314	2.28557	up
Solyc04g074490.2	0.00206698	1.13017	up
Solyc04g064740.2	0.00207347	1.14392	up
Solyc02g071130.2	0.00207788	1.83562	up
Solyc06g074550.2	0.00209194	1.61899	up
Solyc06g009270.2	0.00209494	1.13018	up
Solyc08g062820.2	0.00211261	1.1339	up
Solyc06g074620.2	0.0021423	1.13174	up
Solyc08g062360.2	0.00215346	1.38879	up
Solyc08g013900.2	0.00215397	1.34235	up
Solyc07g017980.1	0.0021994	1.17214	up
Solyc07g063620.2	0.00221713	1.12628	up
Solyc06g063110.1	0.00222482	2.60341	up
Solyc07g042510.2	0.00224026	1.19416	up
Solyc05g055230.1	0.00224408	1.1741	up
Solyc01g087630.1	0.00230671	1.12557	up
Solyc05g010120.2	0.00230869	1.12362	up
Solyc07g025270.1	0.00241401	2.3576	up
Solyc12g088800.1	0.00243594	1.53944	up
Solyc07g065380.2	0.00248371	1.11991	up
Solyc03g119370.1	0.00249324	2.75676	up
Solyc07g056210.2	0.00249324	2.75676	up
Solyc11g040330.1	0.00249999	1.28548	up
Solyc01g066040.2	0.00253152	3.28511	up
Solyc08g036520.2	0.00253152	3.28511	up
Solyc04g007390.2	0.00255635	1.31521	up
Solyc09g050020.1	0.00255852	1.84949	up
Solyc10g006920.2	0.00258832	1.42483	up
Solyc02g092110.2	0.00260439	1.71259	up
Solyc01g009930.1	0.00264635	2.96867	up
Tomato_newGene_774	0.00264635	2.96867	up
Solyc03g114000.2	0.00265506	1.12619	up
Solyc10g047040.1	0.00271035	1.95818	up
Solyc06g048820.1	0.00274836	1.17249	up
Solyc07g008240.2	0.00275739	1.17153	up
Solyc06g068620.2	0.00276072	1.32874	up
Solyc06g007190.2	0.00278055	1.13701	up
Solyc07g049200.2	0.00282884	1.19969	up
Solyc00g019730.1	0.00283218	1.66396	up
Solyc02g086530.2	0.00284655	1.37394	up
Solyc11g062000.1	0.00284655	1.37394	up
Solyc08g081230.1	0.00287346	1.11231	up
Solyc03g113980.2	0.00287476	1.11103	up
Solyc06g035710.1	0.00289375	1.77841	up
Solyc05g005260.1	0.00293419	1.1203	up
Solyc07g063640.1	0.00296533	1.25361	up
Solyc09g090210.2	0.0029671	1.22434	up
Solyc04g071780.2	0.0030432	1.11705	up
Solyc06g072670.2	0.00305669	2.04488	up
Solyc11g072660.1	0.0030714	1.12863	up
Solyc03g113580.1	0.00310322	1.23571	up
Solyc09g056360.2	0.00314957	1.13098	up
Solyc01g094250.2	0.00330717	1.56749	up
Solyc04g005810.2	0.00336018	1.13744	up
Solyc01g112190.2	0.00340486	1.4346	up
Solyc04g081840.2	0.00340984	2.5597	up
Solyc01g090370.1	0.00341329	3.75942	up
Solyc02g082620.1	0.00341329	3.75942	up
Solyc07g049670.2	0.00341329	3.75942	up
Solyc07g006890.1	0.00344717	1.14939	up
Solyc08g066430.1	0.003492	1.16051	up
Solyc02g091650.2	0.00349345	1.15037	up
Solyc09g011860.2	0.00352423	1.10318	up
Solyc01g087990.2	0.00355208	2.31965	up
Solyc08g061210.2	0.00358141	1.64446	up
Solyc06g072870.1	0.0036273	1.1517	up
Solyc01g079600.2	0.00363882	1.10597	up
Solyc11g069070.1	0.00364167	1.10487	up
Solyc06g053930.2	0.00366965	1.49574	up
Solyc04g076260.1	0.00368393	1.93044	up
Solyc02g090820.2	0.00374522	1.10425	up
Solyc12g096570.1	0.00377215	1.75552	up
Solyc01g081450.2	0.00380471	1.10388	up
Solyc05g005250.2	0.00387608	1.09495	up
Solyc11g068460.1	0.00396635	1.14146	up
Solyc07g049460.2	0.00402414	1.23453	up
Solyc05g050360.2	0.0040754	1.30045	up
Solyc03g119340.2	0.00411209	1.18177	up
Solyc05g007930.2	0.00411403	1.10844	up
Solyc04g064630.2	0.00421175	1.15116	up
Solyc03g063600.2	0.00422387	1.08926	up
Solyc02g094260.1	0.00423369	1.83922	up
Solyc11g010500.1	0.00425627	1.13275	up
Solyc03g006700.2	0.00428687	1.09011	up
Solyc12g088850.1	0.00429064	2.91526	up
Solyc05g013060.2	0.00430042	1.36651	up
Solyc12g006970.1	0.00433208	2.40541	up
Solyc02g085830.2	0.00434093	1.24927	up
Solyc05g052520.2	0.00439172	1.08585	up
Solyc10g008280.2	0.00442574	1.08638	up
Solyc02g089900.1	0.00444804	1.0875	up
Solyc01g096320.2	0.00447826	1.22468	up
Solyc12g056600.2	0.00452047	1.0857	up
Solyc01g107100.2	0.0046066	1.08404	up
Solyc06g071810.1	0.00472117	1.08663	up
Solyc05g005810.2	0.00480151	2.12537	up
Solyc06g048410.2	0.0048176	1.09965	up
Solyc08g083110.2	0.00484271	1.0987	up
Solyc05g024160.2	0.00486411	1.3912	up
Solyc05g055870.2	0.00489073	1.12215	up
Solyc06g050870.2	0.00498249	1.13067	up
Solyc04g015570.2	0.00501504	1.35468	up
Solyc01g108240.2	0.00505795	1.07869	up
Solyc10g018120.1	0.0051039	1.70252	up
Solyc03g034250.2	0.00511304	1.11104	up
Solyc06g063300.2	0.00514463	1.13929	up
Solyc07g053760.2	0.00534475	1.07529	up
Solyc02g078660.2	0.00534747	1.25839	up
Solyc06g065850.2	0.0053683	1.25157	up
Solyc01g067740.2	0.00542981	1.11167	up
Solyc09g092000.2	0.00544184	1.07775	up
Solyc04g005040.1	0.00551133	1.08683	up
Solyc03g117840.2	0.00552643	1.20114	up
Solyc03g113570.1	0.00552848	1.43186	up
Solyc02g079230.2	0.00554154	1.08335	up
Solyc03g121340.1	0.00564186	1.813	up
Solyc09g014900.2	0.00581798	1.14045	up
Solyc02g093990.2	0.00582709	1.3493	up
Solyc04g074710.2	0.00582709	1.3493	up
Solyc08g075370.2	0.00584453	1.11782	up
Solyc07g019510.2	0.00588736	1.98284	up
Solyc01g008550.2	0.00591537	1.09463	up
Solyc09g073040.2	0.00591839	1.77487	up
Solyc10g076780.1	0.0059318	1.30814	up
Solyc02g093830.2	0.0059675	1.08441	up
Solyc05g010000.1	0.00606303	3.68732	up
Solyc07g008980.2	0.00606303	3.68732	up
Tomato_newGene_312	0.00606303	3.68732	up
Solyc07g063520.2	0.00608795	1.0662	up
Solyc01g067750.2	0.00621027	1.07207	up
Solyc03g111800.2	0.00621114	1.51535	up
Solyc01g111980.2	0.00623925	1.11153	up
Solyc08g014570.2	0.00624376	1.07529	up
Solyc09g075020.2	0.00632106	1.09574	up
Solyc02g077670.2	0.00638226	1.07886	up
Solyc01g112000.2	0.00658881	1.10666	up
Solyc01g109760.2	0.00658948	1.4273	up
Solyc09g007130.2	0.00670645	1.15558	up
Solyc01g079260.2	0.00671571	1.06483	up
Solyc01g007770.2	0.00674315	1.37284	up
Solyc02g077520.2	0.00674315	1.37284	up
Solyc06g005300.2	0.00674315	1.37284	up
Solyc09g005120.2	0.00677126	1.21676	up
Solyc09g056430.2	0.00681086	1.33074	up
Solyc06g060230.2	0.00682244	1.06119	up
Solyc08g005950.2	0.00683318	2.0902	up
Solyc01g067010.2	0.00688174	1.05906	up
Solyc05g050850.2	0.00694326	1.05867	up
Solyc01g098730.2	0.00697989	1.061	up
Solyc08g074680.2	0.00702451	1.06129	up
Solyc04g077300.2	0.00716959	1.82746	up
Solyc04g072800.2	0.0072482	1.11423	up
Solyc06g036110.1	0.00736574	1.09092	up
Solyc12g009520.1	0.00740739	1.17598	up
Solyc03g093130.2	0.00766965	1.05211	up
Solyc10g079890.1	0.00767073	1.05191	up
Solyc07g056190.2	0.00776547	1.25586	up
Solyc06g031710.2	0.00780158	1.45692	up
Solyc05g014550.1	0.00781156	1.74911	up
Tomato_newGene_409	0.00781156	1.74911	up
Tomato_newGene_1250	0.00792153	1.31271	up
Solyc12g013580.1	0.00796971	1.07142	up
Solyc11g071480.1	0.00807724	1.71536	up
Solyc01g107790.2	0.00815688	1.95079	up
Solyc06g060680.1	0.00821785	1.0531	up
Solyc03g120020.2	0.00823324	1.09346	up
Solyc02g068580.1	0.00827748	1.18221	up
Solyc05g009620.2	0.00831023	1.68457	up
Solyc07g005330.2	0.00854609	1.06302	up
Solyc10g011810.2	0.00863595	1.04877	up
Solyc04g064530.1	0.00868902	1.07673	up
Solyc07g006280.2	0.00869127	1.11357	up
Solyc04g074290.2	0.00871664	1.04777	up
Solyc09g075510.2	0.00876488	1.09089	up
Solyc05g008310.2	0.00878074	1.14789	up
Solyc05g053380.2	0.00884241	1.60649	up
Solyc12g094510.1	0.00897242	1.10741	up
Solyc07g049660.2	0.00900209	1.04257	up
Solyc08g068630.2	0.00904614	1.27511	up
Solyc00g056680.1	0.00908453	1.56375	up
Solyc01g095620.2	0.00908844	1.07199	up
Solyc09g090040.2	0.00915482	1.04534	up
Tomato_newGene_1337	0.00919563	1.84388	up
Solyc05g052340.2	0.00921135	1.12156	up
Solyc02g082550.2	0.00924372	1.08109	up
Solyc12g010400.1	0.00929414	1.03978	up
Solyc02g083360.1	0.00931706	1.32488	up
Solyc01g096050.2	0.00934065	1.04511	up
Solyc01g102700.2	0.00934308	1.03988	up
Solyc12g056550.1	0.009449	1.04377	up
Solyc03g007210.2	0.00958459	1.03782	up
Solyc03g098750.2	0.00959876	1.06228	up
Solyc07g062680.1	0.00968599	2.60746	up
Solyc10g006310.2	0.0096863	1.10464	up
Solyc04g076880.2	0.00980098	1.08784	up
Solyc10g084240.1	0.00988196	1.15466	up
Solyc09g072810.2	0.00991596	1.08226	up
Solyc08g083050.1	0.00997569	1.05574	up
Solyc06g053150.1	0.00998332	1.75908	up
Solyc01g111640.2	0.00999716	1.23221	up
Solyc02g065300.1	0	-6.78897	down
Solyc02g072530.1	0	-6.16257	down
Solyc02g085590.2	0	-3.96993	down
Solyc02g088800.1	0	-3.48385	down
Solyc02g091890.1	0	-3.91252	down
Solyc03g083990.1	0	-4.92833	down
Solyc03g093390.2	0	-2.82251	down
Solyc03g097610.2	0	-2.75565	down
Solyc03g115740.1	0	-7.45347	down
Solyc03g120280.1	0	-6.06637	down
Solyc03g121540.2	0	-2.35535	down
Solyc04g005270.1	0	-6.21479	down
Solyc04g007750.2	0	-2.72728	down
Solyc04g064550.1	0	-6.81458	down
Solyc05g010420.1	0	-3.03273	down
Solyc05g054500.1	0	-6.14921	down
Solyc06g060310.2	0	-2.82893	down
Solyc06g071490.1	0	-5.93244	down
Solyc06g072040.1	0	-6.25276	down
Solyc06g073730.1	0	-6.13573	down
Solyc07g007030.1	0	-6.45083	down
Solyc07g016220.2	0	-2.4588	down
Solyc07g055260.2	0	-3.08432	down
Solyc07g056050.1	0	-7.53276	down
Solyc08g014330.2	0	-3.01266	down
Solyc08g074570.1	0	-5.91676	down
Solyc08g075830.2	0	-3.12355	down
Solyc09g005400.2	0	-2.89887	down
Solyc09g005500.2	0	-2.75964	down
Solyc09g008280.1	0	-8.10996	down
Solyc09g011080.2	0	-2.39772	down
Solyc09g092470.2	0	-4.00696	down
Solyc10g045240.1	0	-2.82419	down
Solyc10g048140.1	0	-7.23064	down
Solyc10g077070.1	0	-6.91269	down
Solyc10g079680.1	0	-6.02309	down
Solyc11g006060.1	0	-6.69098	down
Solyc11g007130.1	0	-2.56626	down
Solyc11g066580.1	0	-3.08445	down
Solyc12g006750.1	0	-5.58388	down
Solyc12g006760.1	0	-5.58749	down
Solyc12g019290.1	0	-5.6976	down
Solyc12g098540.1	0	-2.69579	down
Solyc05g053550.2	1.11e-16	-2.36735	down
Solyc10g008120.2	1.11e-16	-2.57328	down
Solyc10g074440.1	1.11e-16	-2.74365	down
Solyc10g017510.2	2.22e-16	-2.38965	down
Solyc11g066270.1	4.44e-16	-2.43646	down
Solyc03g083420.2	8.88e-16	-2.27123	down
Solyc10g007600.2	1.33e-15	-2.24317	down
Solyc09g089730.2	3.33e-15	-2.45057	down
Solyc08g080040.2	3.44e-15	-2.37333	down
Solyc06g054270.2	5e-15	-2.9695	down
Solyc08g014000.2	9.1e-15	-2.19711	down
Solyc02g082570.1	9.77e-15	-5.65849	down
Solyc09g006010.2	1.01e-14	-4.05802	down
Solyc01g108710.2	1.15e-14	-2.66099	down
Solyc02g078580.1	1.48e-14	-5.63951	down
Solyc10g083440.1	1.55e-14	-2.99555	down
Solyc03g025190.2	1.6e-14	-2.35309	down
Solyc03g020030.2	2.74e-14	-2.29358	down
Solyc02g085020.2	3.7e-14	-2.26769	down
Solyc07g053890.2	4.94e-14	-2.45825	down
Solyc09g065190.1	7.36e-14	-5.56099	down
Solyc01g006290.2	8.97e-14	-2.15224	down
Solyc02g077000.2	1.08e-13	-2.36397	down
Solyc10g081550.1	1.16e-13	-2.727	down
Solyc08g068150.2	1.77e-13	-2.17662	down
Solyc02g064940.1	1.99e-13	-2.89629	down
Solyc12g088170.1	2.05e-13	-2.38082	down
Solyc12g088460.1	2.54e-13	-3.78395	down
Solyc12g098590.1	3.29e-13	-2.21308	down
Solyc04g076520.1	3.83e-13	-5.47796	down
Solyc06g075990.2	5.44e-13	-3.2605	down
Solyc06g073570.2	5.75e-13	-2.58749	down
Solyc09g090070.1	5.83e-13	-5.45643	down
Solyc08g080050.2	5.86e-13	-2.2614	down
Solyc12g098850.1	5.87e-13	-2.05928	down
Solyc08g014490.1	6.23e-13	-2.48058	down
Solyc12g010900.1	6.8e-13	-3.37562	down
Solyc11g012700.1	6.87e-13	-2.0349	down
Solyc03g112760.2	8.45e-13	-2.26889	down
Solyc01g108010.2	8.87e-13	-5.43457	down
Solyc09g072770.1	1.45e-12	-2.84123	down
Solyc02g092700.2	3.13e-12	-2.04821	down
Solyc06g053510.2	4.95e-12	-2.06158	down
Solyc10g080610.1	5.67e-12	-2.02752	down
Solyc10g018300.1	7.49e-12	-1.99601	down
Solyc06g075050.1	8.18e-12	-4.36674	down
Solyc09g091510.2	9.43e-12	-2.12081	down
Solyc10g006330.2	1.05e-11	-2.29414	down
Solyc09g092760.2	1.71e-11	-2.668	down
Solyc11g056680.1	2.07e-11	-2.24711	down
Solyc01g005230.2	2.49e-11	-3.28533	down
Solyc06g073580.2	3.72e-11	-1.89969	down
Solyc01g107460.2	3.92e-11	-3.07026	down
Solyc03g045070.1	4.4e-11	-5.22138	down
Solyc08g068130.1	8.43e-11	-2.37609	down
Solyc00g323130.2	1.03e-10	-1.86829	down
Solyc01g107080.2	1.08e-10	-5.1694	down
Solyc11g072160.1	1.08e-10	-5.1694	down
Solyc08g076220.2	1.81e-10	-1.86143	down
Solyc10g009150.2	1.83e-10	-1.84704	down
Solyc04g007760.2	2.11e-10	-1.86104	down
Solyc02g086820.2	2.31e-10	-2.04489	down
Solyc12g040790.1	2.56e-10	-1.82904	down
Solyc11g012360.1	2.77e-10	-1.84674	down
Solyc08g082590.2	2.94e-10	-2.07758	down
Solyc01g103920.2	2.95e-10	-1.92252	down
Solyc11g007730.1	3.69e-10	-1.96749	down
Solyc08g007540.2	3.93e-10	-2.3948	down
Solyc05g052030.1	6.03e-10	-2.33678	down
Solyc09g098620.1	6.09e-10	-4.49008	down
Solyc04g079030.2	6.15e-10	-2.09623	down
Solyc01g105960.2	6.62e-10	-2.99127	down
Solyc02g071710.2	6.62e-10	-2.99127	down
Solyc04g080380.2	6.77e-10	-2.12037	down
Solyc12g057040.1	6.79e-10	-2.7937	down
Solyc12g005430.1	8.67e-10	-2.09537	down
Solyc05g009080.2	1.05e-09	-2.73386	down
Solyc03g114530.2	1.07e-09	-5.03061	down
Solyc03g080060.1	1.47e-09	-1.88472	down
Solyc02g088470.1	1.71e-09	-5.00118	down
Solyc04g008490.1	1.71e-09	-5.00118	down
Solyc07g052530.2	2.05e-09	-2.60158	down
Solyc05g047390.1	2.63e-09	-3.32894	down
Solyc10g086580.1	3.33e-09	-1.73427	down
Solyc08g061920.1	3.34e-09	-3.04052	down
Solyc07g065270.1	4.39e-09	-4.94044	down
Solyc12g006740.1	4.39e-09	-4.94044	down
Solyc06g072620.2	4.84e-09	-2.45604	down
Solyc10g017960.1	5.48e-09	-2.77738	down
Solyc12g099930.1	7.45e-09	-1.71827	down
Solyc01g109800.2	7.46e-09	-2.50955	down
Solyc09g082660.2	7.52e-09	-1.76815	down
Solyc02g094060.2	8.57e-09	-2.20445	down
Solyc04g074880.2	8.67e-09	-2.53033	down
Solyc01g109500.2	9.13e-09	-1.69518	down
Solyc01g091740.2	1.05e-08	-2.07805	down
Solyc04g008160.1	1.14e-08	-4.87704	down
Solyc02g080120.1	1.26e-08	-2.83849	down
Solyc02g071700.2	1.63e-08	-1.71245	down
Solyc11g045520.1	1.85e-08	-4.84426	down
Solyc02g094860.1	2.3e-08	-2.37894	down
Solyc01g097770.2	2.46e-08	-1.71068	down
Solyc08g079180.2	2.47e-08	-1.6911	down
Solyc02g091920.2	2.81e-08	-2.0628	down
Solyc04g079050.1	2.91e-08	-2.25358	down
Solyc08g065420.2	3.01e-08	-1.88055	down
Solyc12g006140.1	3.26e-08	-1.67648	down
Solyc07g040680.2	4.12e-08	-1.86338	down
Solyc05g053170.2	4.55e-08	-1.72613	down
Solyc09g059170.1	4.61e-08	-1.95978	down
Solyc01g097280.2	4.78e-08	-2.4425	down
Solyc11g005190.1	5.14e-08	-2.05918	down
Solyc02g079480.1	5.28e-08	-2.65648	down
Solyc02g077430.2	7.05e-08	-1.98915	down
Solyc07g006030.2	7.87e-08	-1.67691	down
Solyc06g073720.1	9.88e-08	-1.89842	down
Solyc04g072700.2	1.02e-07	-3.23913	down
Solyc06g035760.2	1.24e-07	-1.62776	down
Solyc09g090810.1	1.32e-07	-4.70515	down
Solyc12g096620.1	1.32e-07	-3.10181	down
Solyc09g065100.1	1.55e-07	-2.64466	down
Solyc12g009930.1	1.87e-07	-1.5909	down
Solyc03g097590.2	1.88e-07	-1.72031	down
Solyc07g007650.1	1.9e-07	-2.88967	down
Solyc07g049290.2	1.9e-07	-1.67478	down
Solyc09g091550.2	1.94e-07	-1.75181	down
Solyc02g082880.2	2.02e-07	-1.85073	down
Solyc05g055320.2	2.11e-07	-2.36271	down
Solyc08g082990.2	2.17e-07	-1.97969	down
Solyc08g076290.2	2.28e-07	-1.70529	down
Solyc07g008210.2	2.66e-07	-2.86907	down
Solyc02g080540.1	2.79e-07	-1.63692	down
Solyc02g020940.2	2.98e-07	-1.61027	down
Solyc02g065220.2	3.22e-07	-2.47024	down
Solyc10g008520.2	3.36e-07	-2.16088	down
Solyc08g082250.2	3.46e-07	-1.56215	down
Solyc06g073260.2	3.48e-07	-1.60969	down
Solyc09g082810.2	3.48e-07	-1.59455	down
Solyc06g069070.1	3.61e-07	-4.63021	down
Solyc12g088020.1	3.61e-07	-4.63021	down
Solyc04g014540.1	3.9e-07	-3.72616	down
Solyc05g046000.2	3.94e-07	-1.93364	down
Solyc08g061010.2	4.02e-07	-2.11857	down
Solyc06g053520.2	4.17e-07	-2.76581	down
Solyc12g096500.1	4.67e-07	-1.55576	down
Solyc01g110360.2	4.88e-07	-1.54146	down
Solyc09g008320.2	5.31e-07	-1.53194	down
Solyc01g102950.2	5.9e-07	-2.0829	down
Solyc10g086570.2	6.35e-07	-1.68603	down
Solyc05g052400.2	6.8e-07	-2.04717	down
Solyc07g043640.2	6.9e-07	-2.55668	down
Solyc07g051820.2	7.37e-07	-2.42216	down
Solyc08g068230.2	7.84e-07	-2.1149	down
Solyc04g015750.2	8e-07	-1.51411	down
Solyc01g104400.2	8.15e-07	-1.69734	down
Solyc03g031860.2	8.75e-07	-1.64256	down
Solyc01g074030.2	8.82e-07	-1.51235	down
Solyc09g091580.2	9.64e-07	-1.55381	down
Solyc07g007950.1	1e-06	-4.55117	down
Solyc07g052290.1	1.03e-06	-2.13564	down
Solyc03g119690.1	1.08e-06	-1.57939	down
Solyc02g078150.2	1.13e-06	-1.59097	down
Solyc05g052240.2	1.13e-06	-1.65468	down
Solyc06g083580.2	1.32e-06	-2.03901	down
Solyc07g019650.2	1.32e-06	-2.03901	down
Solyc11g072200.1	1.39e-06	-1.49917	down
Solyc12g009800.1	1.48e-06	-1.68561	down
Solyc04g077190.2	1.59e-06	-1.79115	down
Solyc02g085880.1	1.67e-06	-2.33734	down
Solyc12g100130.1	1.67e-06	-4.50997	down
Solyc06g072360.2	1.71e-06	-1.89858	down
Solyc08g061490.2	1.87e-06	-1.56655	down
Solyc06g066830.2	1.94e-06	-1.55162	down
Solyc12g008840.1	2.28e-06	-1.47957	down
Solyc11g010960.1	2.3e-06	-2.43544	down
Solyc04g007940.2	2.51e-06	-2.91081	down
Solyc02g062710.1	2.81e-06	-4.46755	down
Solyc02g080790.2	2.81e-06	-4.46755	down
Solyc04g008300.1	2.81e-06	-4.46755	down
Solyc07g044910.1	2.81e-06	-4.46755	down
Solyc08g075910.1	2.81e-06	-4.46755	down
Solyc02g067710.1	3.05e-06	-2.63939	down
Solyc06g067870.2	3.07e-06	-1.62943	down
Solyc06g083070.2	3.09e-06	-1.53523	down
Solyc02g082090.2	3.12e-06	-1.91542	down
Solyc06g059990.2	3.17e-06	-1.75509	down
Solyc02g014300.1	3.43e-06	-1.73094	down
Solyc06g008030.2	3.6e-06	-1.50386	down
Solyc08g068410.1	3.68e-06	-3.56209	down
Solyc10g054420.1	3.92e-06	-1.95025	down
Solyc02g090630.2	4.26e-06	-1.66426	down
Solyc09g092110.2	4.28e-06	-2.18853	down
Solyc03g034430.1	4.65e-06	-1.47868	down
Solyc09g010140.1	4.73e-06	-4.42385	down
Solyc11g010410.1	4.73e-06	-4.42385	down
Solyc02g091560.2	4.77e-06	-1.43709	down
Solyc10g083860.1	5.3e-06	-1.61085	down
Solyc04g076030.1	5.7e-06	-1.86073	down
Solyc06g062990.1	5.86e-06	-2.66904	down
Solyc03g119540.2	6.37e-06	-1.84464	down
Solyc03g116870.2	6.48e-06	-1.80021	down
Solyc03g032010.2	6.76e-06	-1.57095	down
Solyc04g008570.2	7.11e-06	-1.95748	down
Solyc08g077530.2	7.17e-06	-1.48394	down
Solyc10g078720.1	7.18e-06	-1.6579	down
Solyc10g081910.1	7.29e-06	-1.55824	down
Solyc03g019760.2	7.6e-06	-2.01966	down
Solyc06g064550.2	7.6e-06	-1.42158	down
Solyc03g112010.2	7.79e-06	-2.4037	down
Solyc02g069190.2	8.01e-06	-4.37878	down
Solyc03g095990.1	8.01e-06	-4.37878	down
Solyc09g090510.2	8.02e-06	-1.42788	down
Solyc05g010180.2	8.29e-06	-1.74366	down
Solyc07g026680.2	8.35e-06	-1.6355	down
Solyc02g067010.2	8.54e-06	-2.11986	down
Solyc06g075510.2	8.69e-06	-1.43996	down
Solyc09g082980.2	9.03e-06	-1.54893	down
Solyc03g013240.2	9.04e-06	-1.82468	down
Solyc06g084140.2	9.04e-06	-1.40744	down
Solyc10g007690.2	9.14e-06	-1.40563	down
Solyc05g014000.2	9.5e-06	-2.00618	down
Solyc02g076890.1	9.69e-06	-3.81988	down
Solyc01g050040.2	1.05e-05	-2.92606	down
Solyc11g010790.1	1.05e-05	-1.67563	down
Solyc04g080780.2	1.12e-05	-2.21848	down
Solyc04g082120.2	1.12e-05	-2.21848	down
Solyc04g082010.1	1.23e-05	-1.39778	down
Solyc07g056540.2	1.25e-05	-1.40328	down
Solyc07g043390.2	1.37e-05	-1.38773	down
Solyc07g056020.2	1.41e-05	-1.39148	down
Solyc04g007000.1	1.44e-05	-2.36278	down
Solyc10g084340.1	1.44e-05	-2.36278	down
Solyc11g011980.1	1.48e-05	-1.6345	down
Solyc10g050440.1	1.51e-05	-1.57895	down
Solyc11g072990.1	1.51e-05	-2.41004	down
Solyc11g065270.1	1.58e-05	-3.77867	down
Solyc04g015850.2	1.68e-05	-1.5788	down
Solyc11g006300.1	1.8e-05	-2.07282	down
Solyc02g078450.2	1.91e-05	-1.51478	down
Solyc07g063610.2	2.14e-05	-2.11463	down
Solyc04g082250.2	2.28e-05	-1.36306	down
Solyc10g005330.2	2.31e-05	-2.05679	down
Solyc11g042630.1	2.31e-05	-3.41593	down
Solyc02g085120.2	2.32e-05	-4.28419	down
Solyc07g063070.1	2.32e-05	-4.28419	down
Solyc03g031940.2	2.38e-05	-1.75902	down
Solyc08g080590.2	2.4e-05	-2.74889	down
Solyc12g017380.1	2.44e-05	-2.00697	down
Solyc12g098920.1	2.46e-05	-1.47017	down
Solyc12g010910.1	2.58e-05	-1.78267	down
Solyc01g106820.2	2.72e-05	-1.49247	down
Solyc10g076830.1	2.79e-05	-2.193	down
Solyc04g039670.2	2.85e-05	-2.36599	down
Solyc07g017760.1	2.96e-05	-2.04059	down
Solyc10g080390.1	2.97e-05	-1.35701	down
Solyc11g008310.1	3.04e-05	-2.41744	down
Solyc09g014240.2	3.05e-05	-1.46524	down
Solyc05g006740.2	3.08e-05	-1.51959	down
Solyc06g068230.2	3.09e-05	-1.34965	down
Solyc01g067530.2	3.21e-05	-1.56501	down
Solyc07g008540.2	3.32e-05	-2.25979	down
Solyc12g011440.1	3.43e-05	-1.34972	down
Solyc01g079470.2	3.45e-05	-2.83589	down
Solyc07g052540.2	3.61e-05	-2.29913	down
Solyc11g018530.1	3.61e-05	-2.08008	down
Solyc01g057000.2	3.69e-05	-1.88766	down
Solyc08g074620.1	3.97e-05	-4.23446	down
Solyc11g017330.1	3.97e-05	-4.23446	down
Solyc12g088970.1	3.97e-05	-4.23446	down
Solyc08g079730.1	4.28e-05	-1.49462	down
Solyc03g116320.2	4.45e-05	-1.58474	down
Solyc12g096870.1	4.87e-05	-2.00761	down
Solyc07g043130.2	5.06e-05	-1.32688	down
Solyc04g050170.2	5.22e-05	-1.72048	down
Solyc08g065940.2	6.05e-05	-1.45738	down
Solyc01g080580.2	6.2e-05	-1.43082	down
Solyc08g061130.2	6.24e-05	-1.54868	down
Solyc01g090970.2	6.33e-05	-1.94458	down
Solyc06g068500.2	6.38e-05	-1.39711	down
Solyc02g085760.2	6.52e-05	-1.31717	down
Solyc08g016080.2	6.57e-05	-1.3137	down
Solyc11g066930.1	6.83e-05	-4.18296	down
Solyc06g060010.2	7.02e-05	-1.60224	down
Solyc10g086460.1	7.05e-05	-3.64749	down
Solyc01g106480.2	7.09e-05	-1.31281	down
Solyc03g005670.2	7.14e-05	-1.91603	down
Solyc09g063010.2	7.26e-05	-1.48109	down
Solyc01g095690.2	7.49e-05	-2.91223	down
Solyc07g016210.1	7.49e-05	-2.91223	down
Solyc03g083320.2	7.67e-05	-2.08895	down
Solyc03g077910.2	7.89e-05	-1.8547	down
Solyc01g009410.2	7.9e-05	-2.02665	down
Solyc01g006690.2	8.15e-05	-1.55363	down
Solyc06g062810.1	9.02e-05	-1.62379	down
Solyc11g072110.1	9.1e-05	-1.32838	down
Solyc08g007130.2	9.3e-05	-1.54574	down
Solyc03g025710.2	9.7e-05	-2.46447	down
Solyc04g007210.2	9.7e-05	-2.46447	down
Solyc01g109090.2	0.00010306	-1.38773	down
Solyc04g050930.2	0.000106107	-1.53782	down
Solyc09g092710.2	0.000109841	-1.46476	down
Solyc03g034100.2	0.000110028	-1.74724	down
Solyc01g098570.2	0.000110483	-2.62987	down
Tomato_newGene_46	0.00011447	-2.09416	down
Solyc11g066090.1	0.000118	-4.12955	down
Solyc06g073290.1	0.000122219	-1.46657	down
Solyc07g006710.1	0.000125398	-2.37422	down
Solyc01g086920.2	0.000126054	-1.38104	down
Solyc12g087870.1	0.000133143	-1.39073	down
Solyc08g080570.2	0.000133789	-1.28412	down
Solyc09g091970.2	0.000135368	-1.62723	down
Solyc01g095330.2	0.000139862	-1.27582	down
Solyc07g065880.2	0.000145816	-1.30531	down
Solyc08g066940.2	0.000150646	-1.43866	down
Solyc01g110340.2	0.000150966	-1.95456	down
Solyc08g066120.2	0.000151526	-1.4052	down
Solyc06g035980.2	0.000151899	-2.07356	down
Solyc03g062710.2	0.000162156	-2.59852	down
Solyc08g082670.2	0.000162922	-1.72137	down
Solyc07g006680.1	0.000164329	-1.87938	down
Solyc01g007130.2	0.000166553	-1.27784	down
Solyc11g027840.1	0.000168519	-2.18639	down
Solyc01g080020.2	0.000168715	-1.31948	down
Solyc09g082690.2	0.000171644	-1.26482	down
Solyc11g011260.1	0.000172886	-1.27519	down
Solyc02g072540.2	0.00017325	-1.97117	down
Solyc11g005480.1	0.000173877	-1.81839	down
Solyc04g082050.2	0.000174898	-1.41203	down
Solyc10g085680.1	0.000185101	-1.48754	down
Solyc04g040220.2	0.000187199	-1.68904	down
Solyc01g090340.2	0.000188333	-1.60609	down
Solyc03g006540.2	0.00019338	-3.5529	down
Solyc07g047690.1	0.000199535	-1.98935	down
Solyc10g079160.1	0.000204584	-4.07409	down
Solyc04g079040.2	0.00020604	-1.77391	down
Solyc08g079080.2	0.000207987	-1.51009	down
Solyc08g080060.2	0.000210096	-1.7296	down
Solyc05g012510.2	0.000213743	-1.33727	down
Solyc02g084230.1	0.000223425	-1.53077	down
Solyc04g057980.2	0.000225066	-1.95219	down
Solyc04g080040.2	0.000226925	-1.54685	down
Solyc01g006380.2	0.000232735	-2.07817	down
Solyc10g079620.1	0.000237428	-1.31546	down
Solyc10g011940.1	0.000238167	-2.56647	down
Solyc03g094000.2	0.000241245	-3.20956	down
Solyc06g054540.2	0.000247518	-1.27894	down
Solyc12g056260.1	0.000255133	-2.67182	down
Tomato_newGene_1033	0.000257196	-1.48771	down
Solyc06g033850.2	0.000270336	-1.6337	down
Solyc10g077040.1	0.00028086	-1.23885	down
Solyc03g113350.2	0.000286108	-1.24577	down
Solyc02g065060.2	0.000295035	-1.71983	down
Solyc07g045210.1	0.000301781	-1.32973	down
Solyc04g016060.1	0.000308525	-1.35826	down
Solyc03g121920.2	0.000311493	-1.26987	down
Solyc01g080460.2	0.000317197	-1.26076	down
Solyc09g008590.2	0.000318899	-1.51911	down
Solyc03g115900.2	0.000320898	-1.23853	down
Solyc05g012730.1	0.000321711	-3.50317	down
Solyc10g079650.1	0.000321711	-3.50317	down
Solyc10g079660.1	0.000321711	-3.50317	down
Solyc02g064800.2	0.0003353	-1.28963	down
Solyc02g083280.2	0.000344587	-1.23624	down
Solyc05g010320.2	0.000346018	-1.24176	down
Solyc07g005570.2	0.00035527	-1.38469	down
Solyc01g097690.2	0.000356203	-4.01641	down
Solyc12g017340.1	0.000356203	-4.01641	down
Solyc10g076180.1	0.00035671	-1.40463	down
Solyc12g008980.1	0.000364131	-1.56287	down
Solyc03g119150.2	0.000380329	-1.55259	down
Solyc06g066420.2	0.00038181	-2.63665	down
Solyc09g008380.2	0.000400537	-1.30565	down
Solyc05g009150.2	0.000404795	-1.22237	down
Solyc07g015800.1	0.000405896	-1.43474	down
Solyc05g008290.2	0.00040602	-1.3836	down
Solyc09g014280.1	0.000407885	-1.21948	down
Solyc04g064670.2	0.000429651	-1.52392	down
Solyc05g050110.2	0.000429651	-1.52392	down
Solyc01g107890.2	0.000434278	-1.21873	down
Solyc09g008860.2	0.000434757	-1.21707	down
Solyc03g111260.2	0.000442342	-1.61	down
Solyc08g081380.2	0.00044669	-1.3683	down
Solyc11g073240.1	0.000458049	-1.63925	down
Solyc03g005820.2	0.000479858	-1.49811	down
Solyc03g095600.1	0.000479858	-1.49811	down
Solyc08g075520.2	0.000490573	-1.21054	down
Solyc04g040160.2	0.000510536	-1.32314	down
Solyc06g067860.2	0.00052361	-1.31297	down
Solyc01g079370.2	0.000540823	-1.86086	down
Solyc01g110000.2	0.000553854	-1.24806	down
Solyc09g097780.2	0.000569377	-1.24164	down
Solyc08g083360.2	0.000590935	-1.39356	down
Solyc03g111610.2	0.000617824	-1.2674	down
Solyc07g006740.2	0.000619442	-2.72709	down
Solyc07g047820.1	0.000622824	-3.95632	down
Solyc09g091710.1	0.000622824	-3.95632	down
Solyc10g080430.1	0.000622824	-3.95632	down
Solyc12g006700.1	0.000622824	-3.95632	down
Solyc10g051200.1	0.000631358	-1.458	down
Solyc10g008740.2	0.000634613	-1.20848	down
Solyc01g100910.2	0.000637433	-1.58458	down
Solyc01g080280.2	0.000681892	-1.20342	down
Solyc01g008920.2	0.000703415	-1.59804	down
Solyc12g087890.1	0.000713934	-1.18918	down
Solyc09g009670.2	0.000741116	-1.36395	down
Solyc01g080840.2	0.000745301	-1.20149	down
Solyc09g014530.2	0.000745667	-1.18713	down
Solyc08g080380.2	0.000764968	-1.5717	down
Solyc09g065180.2	0.000771956	-1.27794	down
Solyc01g010480.2	0.000779592	-1.61296	down
Solyc03g121970.1	0.000814529	-1.59842	down
Solyc02g077590.1	0.000814624	-2.28944	down
Solyc03g005760.1	0.000817486	-1.18181	down
Solyc08g076150.2	0.000823658	-1.47365	down
Solyc07g052610.2	0.000829701	-1.70615	down
Solyc03g026040.2	0.000856849	-2.56361	down
Solyc09g090310.1	0.000856849	-2.56361	down
Solyc02g084990.2	0.000858223	-1.1905	down
Solyc05g045670.2	0.00088228	-1.24915	down
Solyc07g055470.2	0.000886097	-1.52549	down
Solyc08g075490.2	0.000886097	-1.52549	down
Solyc02g080260.2	0.000897834	-3.39825	down
Solyc09g011810.2	0.000919719	-1.25367	down
Solyc05g006980.2	0.000926198	-1.33382	down
Solyc07g056230.2	0.000948039	-2.68703	down
Solyc02g036470.2	0.000982302	-1.3543	down
Solyc09g007480.2	0.00100385	-1.48626	down
Solyc07g063910.2	0.00101018	-3.0699	down
Solyc08g066590.2	0.00102501	-1.57095	down
Solyc04g015490.2	0.00103764	-1.24812	down
Solyc02g092560.2	0.00104888	-1.17297	down
Solyc04g077780.2	0.00104925	-1.17609	down
Solyc04g009030.2	0.0010604	-1.19019	down
Solyc02g084400.2	0.00106193	-1.61472	down
Solyc01g079570.2	0.0010629	-1.21538	down
Solyc01g017860.2	0.00109362	-3.89363	down
Solyc07g061730.2	0.00109362	-3.89363	down
Solyc07g064350.1	0.00109362	-3.89363	down
Solyc08g029220.1	0.00109362	-3.89363	down
Solyc11g010400.1	0.00109956	-1.92043	down
Solyc04g009020.2	0.00110198	-1.34671	down
Solyc12g010380.1	0.00110356	-1.39266	down
Solyc08g076690.1	0.00111435	-2.43063	down
Solyc05g005840.2	0.00112608	-1.38715	down
Solyc05g053100.2	0.00114015	-1.33863	down
Solyc08g080250.2	0.00114407	-1.65041	down
Solyc11g071550.1	0.00114407	-1.65041	down
Solyc09g057570.2	0.0011443	-1.32005	down
Solyc01g095320.2	0.00114707	-1.20374	down
Solyc12g006470.1	0.00118729	-1.16775	down
Solyc02g085950.2	0.00119178	-1.208	down
Solyc04g007110.2	0.00121069	-1.39498	down
Solyc10g005690.2	0.00121492	-1.27998	down
Solyc01g081490.2	0.00123077	-1.2775	down
Solyc07g052660.1	0.00123684	-1.55721	down
Solyc09g083150.2	0.00123684	-1.55721	down
Solyc03g031760.2	0.00124057	-1.7727	down
Solyc02g036460.2	0.00128222	-1.49115	down
Solyc12g088220.1	0.00135276	-1.36298	down
Solyc01g111400.2	0.00136146	-1.17198	down
Solyc04g083010.2	0.00140731	-1.17142	down
Solyc09g057760.2	0.00145196	-2.64582	down
Solyc02g069920.2	0.00146646	-1.34005	down
Solyc11g044910.1	0.00146812	-1.21531	down
Solyc12g005370.1	0.00147418	-1.26584	down
Solyc06g072710.2	0.00155762	-1.24354	down
Solyc06g005700.1	0.00158992	-1.29594	down
Solyc07g039310.1	0.00162637	-1.45191	down
Solyc10g081050.1	0.00163389	-3.02018	down
Solyc05g013320.1	0.00164016	-2.39458	down
Solyc01g006330.2	0.0016579	-2.22603	down
Solyc04g081320.2	0.00171664	-1.24676	down
Solyc01g087440.2	0.00176374	-1.34113	down
Solyc05g050430.1	0.00176804	-1.70217	down
Solyc12g013840.1	0.00177455	-1.18062	down
Solyc08g059660.1	0.00177751	-1.14688	down
Solyc08g005660.1	0.00179319	-1.4668	down
Solyc02g081150.1	0.00185262	-1.29798	down
Solyc03g025610.1	0.00185338	-1.24321	down
Solyc09g075970.2	0.00186592	-1.35648	down
Solyc06g011370.2	0.00188435	-1.13879	down
Solyc03g044330.1	0.00189649	-1.13605	down
Solyc09g065570.2	0.00190403	-1.2688	down
Solyc05g008300.1	0.00192827	-3.82808	down
Solyc10g007330.1	0.00192827	-3.82808	down
Solyc11g005290.1	0.00192827	-3.82808	down
Solyc10g083400.1	0.00193142	-2.14526	down
Solyc02g062340.2	0.00195172	-1.13416	down
Solyc07g047740.2	0.00198523	-1.24168	down
Solyc02g021480.2	0.0020198	-1.27316	down
Solyc02g089350.2	0.00203498	-1.73291	down
Solyc12g042910.1	0.00205873	-1.54082	down
Solyc12g005440.1	0.00209194	-1.61899	down
Solyc06g082210.1	0.00211465	-1.52769	down
Solyc03g006880.2	0.00222482	-2.60341	down
Solyc03g034170.2	0.0022356	-1.2451	down
Solyc10g080550.1	0.00235268	-1.40544	down
Solyc03g059080.1	0.00236444	-2.19325	down
Tomato_newGene_448	0.00236444	-2.19325	down
Solyc11g068960.1	0.0023799	-1.12315	down
Solyc11g066660.1	0.0023925	-1.12745	down
Solyc10g077000.1	0.00240724	-1.2997	down
Solyc11g006710.1	0.00241047	-1.26786	down
Solyc02g084720.2	0.00244669	-1.12171	down
Solyc01g094340.2	0.00250854	-1.23239	down
Solyc03g082560.2	0.00255504	-1.366	down
Solyc01g067660.2	0.00255681	-1.11811	down
Solyc03g113460.1	0.00255852	-1.84949	down
Solyc08g007680.1	0.00255852	-1.84949	down
Solyc05g012600.2	0.00261341	-1.50091	down
Tomato_newGene_1142	0.00264635	-2.96867	down
Solyc01g109320.2	0.00271035	-1.95818	down
Solyc02g094100.2	0.00273054	-1.81236	down
Solyc05g052890.2	0.00273054	-1.81236	down
Solyc07g053640.1	0.00274274	-1.20781	down
Solyc11g012850.1	0.00277689	-1.15213	down
Solyc08g079310.2	0.00286648	-1.31068	down
Solyc04g006940.2	0.00287204	-1.21275	down
Solyc04g049800.2	0.00288975	-1.21094	down
Solyc01g104950.2	0.00289852	-1.11451	down
Solyc06g076330.2	0.00294855	-1.90912	down
Solyc09g092260.2	0.00294855	-1.90912	down
Solyc10g076940.1	0.00294855	-1.90912	down
Solyc03g043950.2	0.00301442	-1.11895	down
Solyc01g109600.2	0.00309082	-1.13682	down
Solyc03g119270.1	0.00310322	-1.23571	down
Solyc10g050110.1	0.00311189	-1.18997	down
Solyc11g073160.1	0.0031583	-1.38987	down
Solyc02g067050.2	0.00317816	-1.22657	down
Solyc01g006580.2	0.00321918	-1.16817	down
Solyc10g083300.1	0.00322211	-1.58444	down
Solyc03g031730.2	0.00330908	-1.11375	down
Solyc01g107430.2	0.00334061	-1.28602	down
Solyc01g009400.2	0.00337958	-1.98422	down
Solyc07g008480.1	0.00341329	-3.75942	down
Solyc09g014160.1	0.00341329	-3.75942	down
Solyc12g042430.1	0.00341329	-3.75942	down
Solyc07g045420.2	0.00343868	-1.10727	down
Solyc01g057310.2	0.0034563	-1.22446	down
Solyc02g079200.1	0.00346404	-1.53641	down
Solyc01g073670.2	0.00349176	-1.2201	down
Solyc02g065280.2	0.00355208	-2.31965	down
Solyc03g042550.1	0.00355208	-2.31965	down
Solyc02g083310.2	0.00363887	-1.11848	down
Solyc01g068250.2	0.00368393	-1.93044	down
Solyc06g007960.2	0.00368393	-1.93044	down
Solyc07g018360.2	0.00371635	-1.09606	down
Solyc02g077880.2	0.00378957	-1.14177	down
Solyc03g121830.1	0.00382051	-2.08186	down
Solyc08g076730.2	0.00384888	-1.09793	down
Solyc11g040140.1	0.00394589	-1.72506	down
Solyc00g140060.2	0.00402958	-1.30954	down
Solyc03g121180.2	0.00408312	-1.55032	down
Solyc03g097600.2	0.00414125	-1.09526	down
Solyc03g005010.2	0.00415529	-1.17737	down
Solyc04g008430.1	0.00415653	-1.11368	down
Solyc01g010510.2	0.00426445	-3.22503	down
Solyc10g007960.1	0.00426445	-3.22503	down
Solyc02g086750.1	0.00427942	-1.10942	down
Solyc05g052250.2	0.00429064	-2.91526	down
Solyc07g042440.2	0.00430042	-1.36651	down
Solyc00g227860.1	0.00444238	-1.33536	down
Solyc09g083390.1	0.00460394	-1.08328	down
Solyc06g050170.2	0.00461525	-1.0902	down
Solyc01g096880.2	0.00463783	-1.1099	down
Solyc07g066390.1	0.00463867	-1.95479	down
Solyc03g025410.2	0.00471485	-1.13246	down
Solyc04g025440.2	0.00485701	-1.56616	down
Solyc11g022460.1	0.00486604	-1.23831	down
Solyc01g009430.2	0.00502767	-1.20392	down
Solyc10g039210.2	0.00504042	-1.34819	down
Solyc08g005630.2	0.00522536	-2.51464	down
Solyc07g064160.2	0.00536456	-1.17273	down
Solyc04g063240.2	0.0053974	-1.24199	down
Solyc12g044950.1	0.00541561	-1.23599	down
Solyc01g107320.2	0.00543745	-1.64987	down
Solyc11g010630.2	0.00548083	-1.08758	down
Solyc06g065440.1	0.00558326	-1.1855	down
Solyc04g015600.2	0.00561111	-1.17855	down
Solyc10g047170.1	0.00573748	-1.15282	down
Solyc05g005960.2	0.00597882	-1.28424	down
Solyc01g080900.2	0.00598942	-1.12088	down
Solyc09g083190.2	0.00599992	-1.2716	down
Solyc11g069990.1	0.00606303	-3.68732	down
Solyc11g068950.1	0.00609389	-1.0876	down
Solyc10g076730.1	0.0061306	-1.53101	down
Solyc11g072490.1	0.00615726	-1.1073	down
Solyc08g066510.2	0.00621114	-1.51535	down
Solyc11g020040.1	0.00633137	-1.07628	down
Solyc11g012450.1	0.0063563	-1.12031	down
Solyc12g006050.1	0.00663117	-1.09584	down
Solyc02g078160.2	0.00670107	-1.06074	down
Solyc03g006100.2	0.00671191	-1.16899	down
Solyc08g079550.1	0.00671317	-1.17062	down
Solyc09g042660.2	0.00678725	-1.87332	down
Solyc01g105020.2	0.00680832	-1.24716	down
Solyc03g113630.2	0.00681494	-1.25429	down
Solyc05g050540.2	0.00682576	-1.26988	down
Solyc01g073750.2	0.00693738	-1.05984	down
Solyc11g008780.1	0.00696363	-1.06852	down
Solyc08g005450.1	0.00702631	-1.06141	down
Solyc01g058160.2	0.00716959	-1.82746	down
Solyc04g015470.2	0.00727838	-1.14322	down
Solyc10g085310.1	0.00727838	-1.14322	down
Solyc08g080550.1	0.00742097	-1.54619	down
Solyc06g060560.2	0.00753189	-2.01554	down
Solyc09g074410.2	0.00759967	-1.21653	down
Solyc09g005260.2	0.00775034	-1.09537	down
Solyc09g092270.2	0.00775899	-1.46969	down
Solyc03g077920.1	0.00779404	-1.26385	down
Solyc01g102810.2	0.00783458	-1.08106	down
Solyc10g007500.2	0.00800629	-1.04914	down
Solyc12g008430.1	0.00807724	-1.71536	down
Solyc04g009510.2	0.00821179	-1.05137	down
Solyc06g074850.2	0.00825898	-1.09946	down
Solyc07g043460.2	0.00835883	-1.04671	down
Solyc04g049930.2	0.00837101	-1.11411	down
Solyc10g081120.1	0.0085824	-1.0468	down
Solyc12g009440.1	0.00863849	-1.22221	down
Solyc12g100110.1	0.00869003	-1.63043	down
Solyc03g111700.2	0.00880471	-1.24216	down
Solyc09g091690.1	0.00919563	-1.84388	down
Tomato_newGene_801	0.00922446	-1.0443	down
Solyc12g088760.1	0.00923037	-1.30639	down
Solyc02g069620.2	0.00931706	-1.32488	down
Solyc12g094640.1	0.00939647	-1.13128	down
Solyc11g065380.1	0.009417	-1.47951	down
Solyc11g068360.1	0.00941771	-1.35331	down
Solyc11g006830.1	0.00949636	-1.39677	down
Solyc07g039190.2	0.00950208	-1.40679	down
Solyc12g011300.1	0.00960861	-1.20457	down
Solyc01g056370.2	0.00971684	-2.31929	down
Solyc09g065160.2	0.00971932	-1.07283	down
Solyc03g118240.2	0.00976397	-1.07529	down
Solyc12g055940.1	0.00982586	-1.11039	down
